# Supplementary material
Source: PubMed Central journal article supplement (PMC6588457)
Supplement: NIHMS1523237-supplement-1.pdf [file NIHMS1523237-supplement-1.pdf]

## **SUPPLEMENTARY INFORMATION**

### **Basal expression of interferon regulatory factor 1 drives intrinsic hepatocyte resistance to multiple RNA viruses**

Daisuke Yamane<sup>1,2,3\*</sup>, Hui Feng<sup>1,2</sup>, Efraín E. Rivera-Serrano<sup>1,2</sup>, Sara R. Selitsky<sup>1</sup>, Asuka Hirai-Yuki<sup>1,2,4</sup>, Anshuman Das<sup>1,2</sup>, Kevin L. McKnight<sup>1,2</sup>, Ichiro Misumi<sup>5</sup>, Lucinda Hensley<sup>1,2</sup>, William Lovell<sup>1,2</sup>, Olga González-López<sup>1,2</sup>, Ryosuke Suzuki<sup>6</sup>, Mami Matsuda<sup>6</sup>, Hiroki Nakanishi<sup>7</sup>, Takayo Ohto-Nakanishi<sup>8</sup>, Takayuki Hishiki<sup>3</sup>, Eliane Wauthier<sup>1,9</sup>, Tsunekazu Oikawa<sup>1,9,10</sup>, Kouichi Morita<sup>11</sup>, Lola M. Reid<sup>1,9</sup>, Praveen Sethupathy<sup>1,12</sup>, Michinori Kohara<sup>3</sup>, Jason K. Whitmire<sup>1,5</sup>, and Stanley M. Lemon<sup>1,2\*</sup>

## **Supplementary Information Contents**

The Supplementary Information comprises the 10 Supplementary Figures and 9 Supplementary Tables.

### **Supplementary Figures**

Supplementary Figure 1. shRNA-mediated knockdown of host factors linked to RLR and TLR signaling pathways.

Supplementary Figure 2. IRF1 is dispensable for RIG-I-triggered, IRF3-dependent antiviral responses.

Supplementary Figure 3. IFN-independent activity of IRF1 upon RNA virus infection in Huh-7.5 cells.

Supplementary Figure 4. Host antiviral factors that restrict replication of HCV RNA in PH5CH8 cells.

Supplementary Figure 5. Regulation of basal and induced IRF1 abundance and IRF1 transcriptional activity.

Supplementary Figure 6. Transcriptomic analysis of PH5CH8 cells expressing IRF1 vs. IRF3 sgRNAs.

Supplementary Figure 7. Antiviral activities of IRF1 target genes and their IRF1-dependent expression *in vitro* and *in vivo*.

Supplementary Figure 8. Effect of RARRES3 overexpression on replication of HCV, DENV and HRV-14, and cellular glycerophospholipid profiles in Huh-7.5 cells.

Supplementary Figure 9. Data for additional biological replicates.

Supplementary Figure 10. Uncropped blots.

### **Supplementary Tables**

Supplementary Table 1. Short hairpin RNAs used for knockdowns.

Supplementary Table 2. Single guide RNAs used for CRISPR/Cas9 knockouts.

Supplementary Table 3. Oligonucleotide primers used for qRT-PCR of IRF1-target host genes.

Supplementary Table 4. siRNAs used for gene silencing.

Supplementary Table 5. Differentially expressed genes ( $> 1.0 \log_2$ ) in PH5CH8 cells transduced with 2 independent sgRNAs targeting *IRF1*.

Supplementary Table 6. Gene Ontology (GO) analysis and functional annotation of IRF1-regulated genes.

Supplementary Table 7. Differentially expressed genes ( $> 0.9 \log_2$ ) in PH5CH8 cells transduced with *IRF3* sgRNA.

Supplementary Table 8. IRF1-binding sites identified within the transcription regulatory region of IRF1 effector genes.

Supplementary Table 9. The exact *p*-values for the statistical analysis in Figures 1-4.

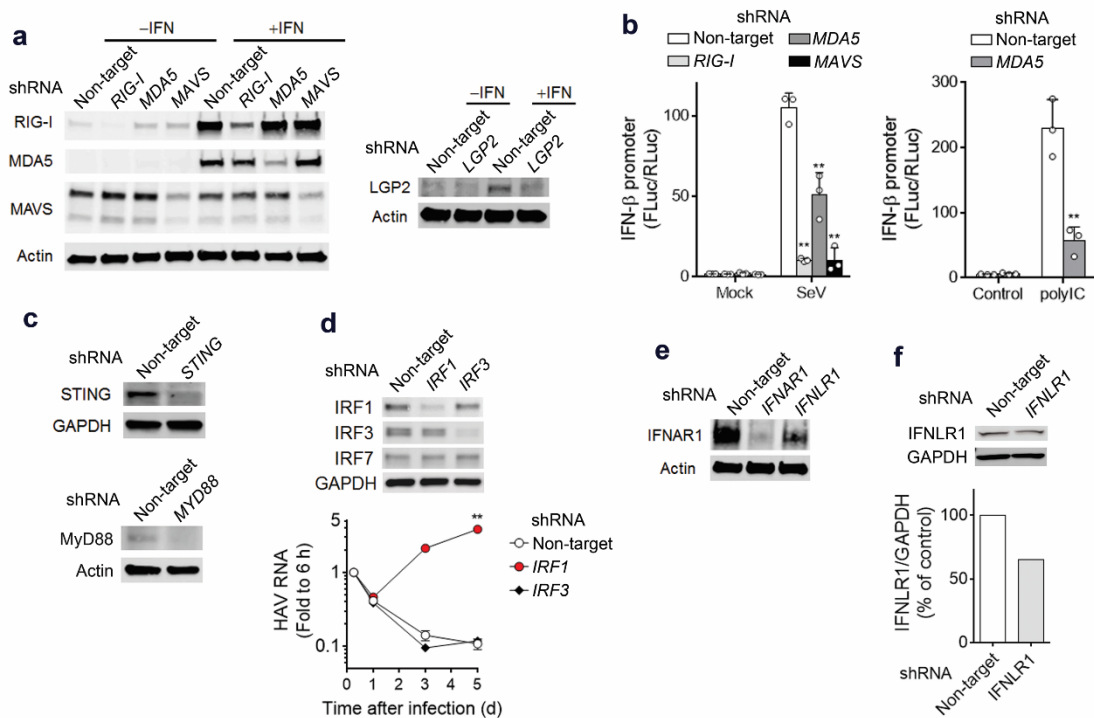

**Supplementary Figure 1. shRNA-mediated knockdown of host factors linked to RLR and TLR signaling pathways.** (a) Immunoblots of RIG-I-like receptors (RLRs) in PH5CH8 cells stably expressing indicated shRNAs. Cells were stimulated with  $100 \text{ U ml}^{-1}$  IFN- $\alpha$  for 24 h where indicated. (b) Functional depletion of the RLRs was confirmed by stimulation with either Sendai virus (SeV) challenge ( $50 \text{ U ml}^{-1}$ ) or polyIC transfection ( $1 \mu\text{g ml}^{-1}$ ). Values shown are mean  $\pm$  s.d. from 3 independent experiments.  $**p < 0.0001$  vs. non-targeting control (two-way ANOVA with Sidak's multiple comparisons test). (c) Immunoblots of STING and MyD88 in the indicated shRNA-transduced PH5CH8 cells. (d) shRNA knockdown of *IRF1* and *IRF3* and its effects on HAV replication over ensuing 5 days. Values shown are mean  $\pm$  s.d. of 3 technical replicates representative of 2 independent experiments.  $*p < 0.0001$  vs. non-target shRNA, by two-way ANOVA with Dunnett's multiple comparisons test. (e) Immunoblot of IFNAR1 in PH5CH8 cells transfected with shRNA targeting *IFNAR1* versus *IFNLR1*. (f) Immunoblot of IFNLR1 in PH5CH8 cells expressing shRNA targeting *IFNLR1*. Normalized quantity of IFNLR1 is shown below. Data shown in (a, c, e, f) are representative of 2 independent experiments.

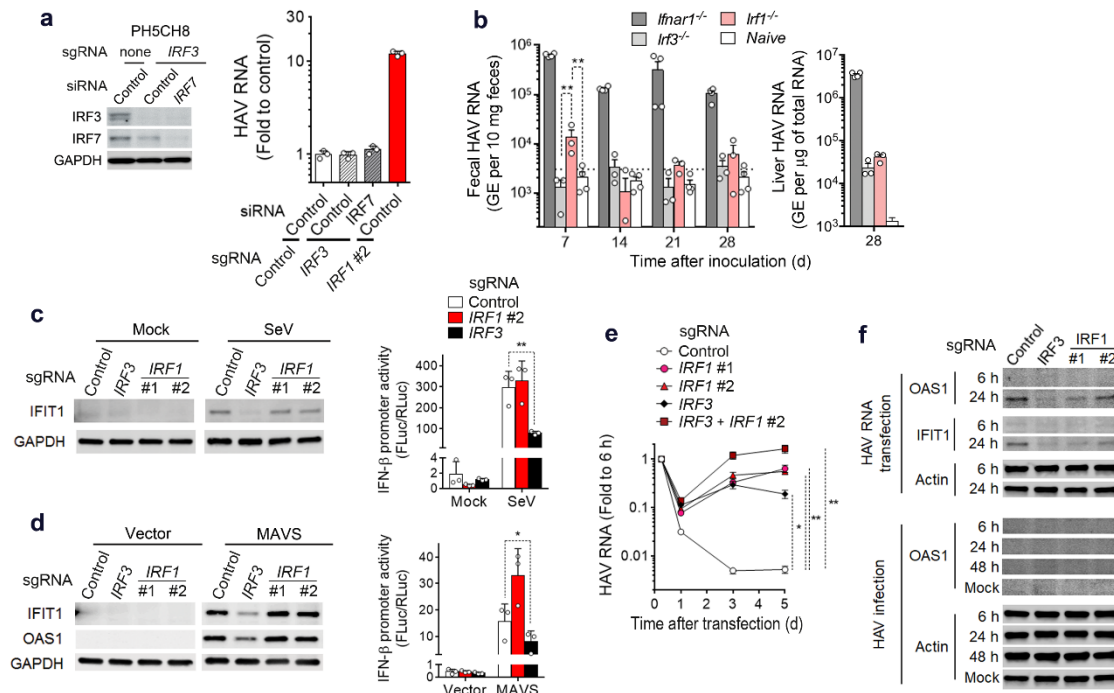

**Supplementary Figure 2. IRF1 is dispensable for RIG-I-triggered, IRF3-dependent antiviral responses.** (a) Relative HAV RNA levels in control vs. *IRF7* siRNA-transfected PH5CH8 cells expressing *IRF3* sgRNA on day 4 post-infection. Immunoblots of *IRF7* and *IRF3* are shown on left. Values shown are mean  $\pm$  s.d. from 3 technical replicates representative of 2 independent experiments. (b) HAV RNA present in fecal (left) and liver (right) samples in mice with different genetic backgrounds over 28 days following intravenous infectious virus challenge. Values shown are mean  $\pm$  s.d. from 3-4 animals in each group (each symbol = one animal). \*\* $p = 0.002$  (vs. *Irf3*<sup>-/-</sup>),  $p = 0.0004$  (vs. naïve) by two-sided unpaired t-test. (c, d) Immunoblots of ISG proteins (left, *IFIT1* and *OAS1*) or *IFN-β* promoter activities (right) in PH5CH8 cells expressing *IRF1* vs. *IRF3* sgRNAs stimulated by either (c) SeV challenge (50 U ml<sup>-1</sup> for 24 h, \*\* $p < 0.0001$  vs. control, two-way ANOVA with Dunnett's multiple comparisons test) or (d) MAVS overexpression (24 h post-transfection, \*\* $p = 0.038$  vs. control (two-sided unpaired t-test). Values shown are mean  $\pm$  s.d. from 3 independent experiments. (e) Replication of HAV RNA introduced by electroporation in indicated PH5CH8 sgRNA knockout cell lines. Values shown are mean  $\pm$  s.d. from 3 independent transfections. \* $p = 0.022$ , \*\* $p = 0.0013$  (*IRF1*#1),  $p = 0.0012$  (*IRF1*#2),  $p < 0.0001$  (*IRF3*+*IRF1*#2) vs. control (two-way ANOVA with Holm-Sidak's multiple comparisons test). (f) Immunoblots of ISGs, *OAS1* and *IFIT1*, and Actin as loading control in extracts of RNA-transfected (upper) versus virus-infected (lower) PH5CH8 cells expressing *IRF3* vs *IRF1* sgRNAs. Data shown represent 2 independent experiments.

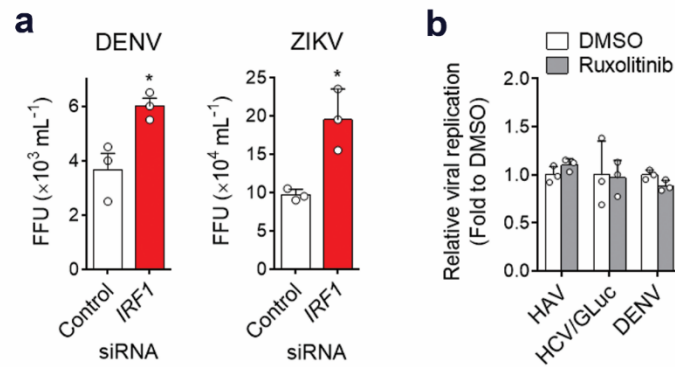

**Supplementary Figure 3. IFN-independent activity of IRF1 upon RNA virus infection in Huh-7.5 cells.** (a) Infectious yields of flaviviruses (DENV and ZIKV) from IRF1-depleted versus control Huh-7.5 cells at 24 h post infection (p.i.). Values shown are mean  $\pm$  s.d. from 3 independent experiments. \* $p = 0.0249$  (DENV),  $p = 0.0139$  (ZIKV) vs. control (two-sided unpaired t-test) (b) Relative viral RNA levels at 24 h p.i. (HAV and DENV) or relative GLuc activity at 48 h p.i. (HCV/GLuc) in Huh-7.5 cells treated with DMSO or 3  $\mu\text{M}$  ruxolitinib. Values are mean  $\pm$  s.d. from 3 technical replicates and are representative of 2 independent experiments.

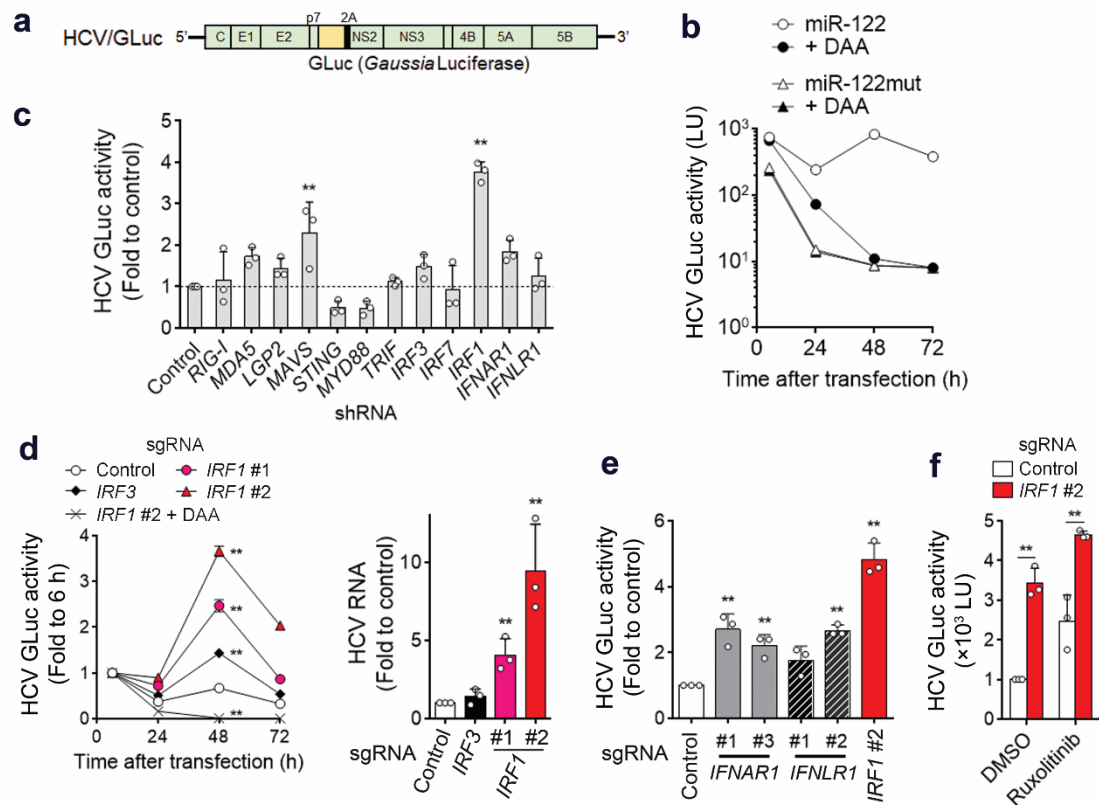

**Supplementary Figure 4. Host antiviral factors that restrict replication of HCV RNA in PH5CH8 cells.** (a) Organization of the HCV reporter virus genome that expresses *Gaussia* luciferase (GLuc) fused to foot-and-mouth disease virus 2A autoprotease as part of the HCV polyprotein. (b-f) PH5CH8 cells were co-electroporated with HCV RNA (JFH1-QL/GLuc, 5  $\mu$ g) and 250 nmol miR-122 duplex mimics. GLuc activities were measured in culture supernatant fluids collected at 6, 24, 48 and 72 h. Cells were re-fed with fresh culture medium at each interval. (b) Kinetics of HCV RNA replication over 72 h following electroporation of PH5CH8 cells. A direct-acting antiviral (DAA, 30  $\mu$ M sofosbuvir) was added to provide a non-replicating control. Note that a miR-122 mutant containing a substitution at the p6 position (miR-122mut) within the guide sequence failed to promote replication. Values are mean  $\pm$  s.d. from 3 technical replicates representative of 2 independent experiments. (c) Replication of HCV RNA co-transfected with miR-122 mimics into PH5CH8 cells expressing the indicated shRNAs. Relative activities of GLuc secreted between 24-48 h are shown. Values shown are mean  $\pm$  s.d. from 3 independent experiments. \*\* $p$  = 0.0038 (*MAVS*),  $p$  < 0.0001 (*IRF1*) vs. control (one-way ANOVA with Dunnett's multiple comparisons test) (d) Kinetics of GLuc produced from PH5CH8 cells expressing *IRF1* vs. *IRF3* sgRNAs between 6 and 72 h following RNA electroporation (left), and HCV RNA levels at 48 h (right). Values are mean  $\pm$  s.d. from 3 technical replicates representative of 2 independent experiments (left) or 3 (right) independent experiments. (left) \*\* $p$  < 0.0001, knockouts vs. control (two-way ANOVA with Dunnett's multiple comparisons test), (right) \*\* $p$  = 0.0072 (*IRF1*#1),  $p$  = 0.008 (*IRF1*#2) vs. control (two-sided unpaired test). (e) JFH1-QL/GLuc replication in electroporated PH5CH8 cells expressing indicated sgRNAs. Values shown are mean  $\pm$  s.d. from 3 independent experiments. \*\* $p$  = 0.0004 (*IFNAR1*#1),  $p$  = 0.0065 (*IFNAR1*#2),  $p$  = 0.0005 (*IFNLRL1*#2),  $p$  < 0.0001 (*IRF1*#2) vs. control (one-way ANOVA with Dunnett's multiple comparisons test) (f) HCV replication in PH5CH8 cells expressing control vs. *IRF1* sgRNAs treated with 3  $\mu$ M ruxolitinib or DMSO vehicle. Values shown are mean  $\pm$  s.d. from 3 independent experiments. \*\* $p$  = 0.0001 (DMSO),  $p$  = 0.0002 (Ruxolitinib) vs. control (two-way ANOVA with Sidak's multiple comparisons test).

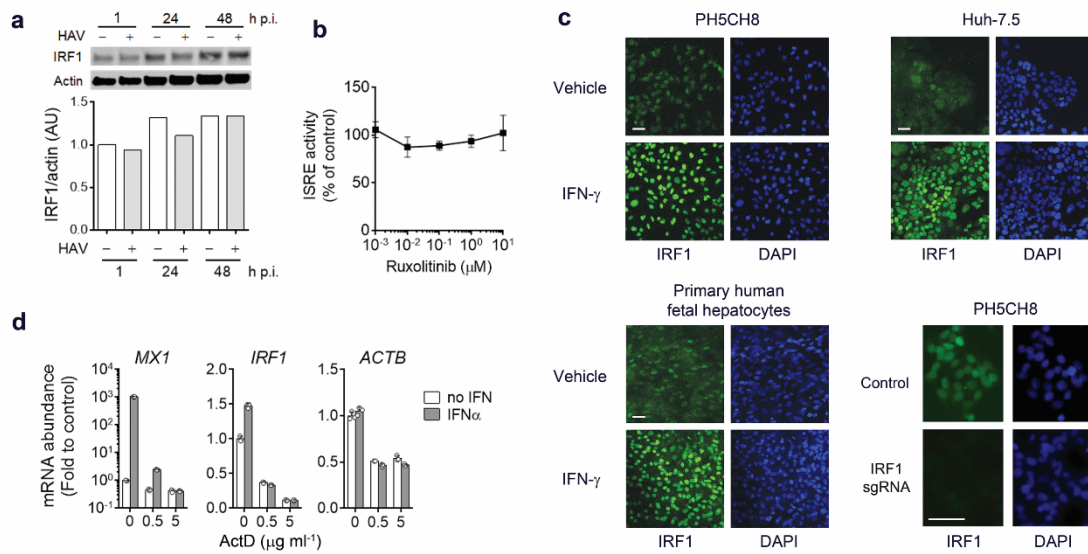

**Supplementary Figure 5. Regulation of basal and induced IRF1 abundance and IRF1 transcriptional activity.** (a) IRF1 protein abundance is not altered following HAV challenge of PH5CH8 cells at an m.o.i. of 10. Relative IRF1 protein abundance normalized to that of actin is shown below. Data shown are representative of 2 independent experiments. (b) Basal ISRE activity in PH5CH8 cells is not regulated by JAK/STAT signaling. PH5CH8 cells were treated with indicated doses of ruxolitinib and ISRE promoter activity measured. Values shown are mean  $\pm$  s.e.m. from 3 technical replicates representative of 2 independent experiments. (c) Nuclear localization of IRF1 in different hepatic cell cultures under basal conditions and following treatment with the agonist IFN- $\gamma$  (1,000 U ml $^{-1}$  for 24 h). The antibody staining of PH5CH8 cells expressing control vs. IRF1 #1 sgRNAs is shown on lower right panels to demonstrate the specificity of the nuclear IRF1 signals. Scale bar, 50  $\mu\text{m}$ . Data shown are representative of 2 independent experiments. (d) Inhibition of *de novo* transcription of cellular genes following treatment with different concentrations of actinomycin D (ActD). Huh-7.5 cells pretreated with ActD were stimulated with 100 U ml $^{-1}$  IFN $\alpha$  for 16 h and analyzed for transcripts of two IFN-responsive genes (*MX1* and *IRF1*) and actin (*ACTB*). Values shown are mean  $\pm$  s.d. from 3 technical replicates.

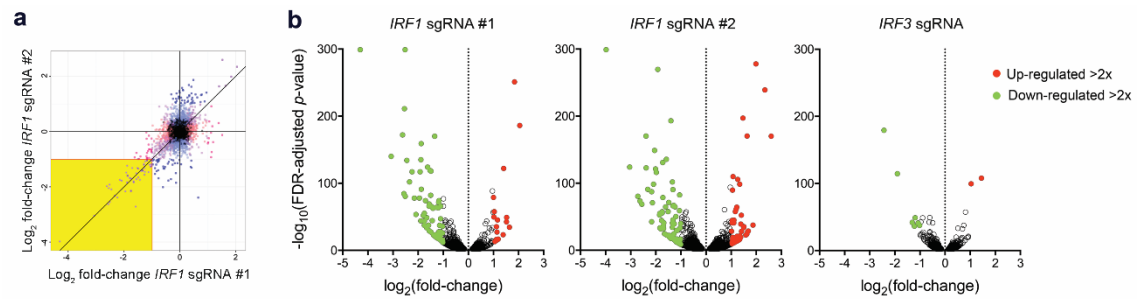

**Supplementary Figure 6. Transcriptomic analysis of PH5CH8 cells expressing *IRF1* vs. *IRF3* sgRNAs.** RNA samples extracted from HAV-infected PH5CH8 cells expressing *IRF1* #1, *IRF1* #2, *IRF3*, and control sgRNAs in triplicate cultures were subjected to high throughput sequencing. Reads were identified from an average of  $16,402 \pm 151$  s.d. genes in each cell line. Compared with control cells, 652 genes were down-regulated (adjusted p-value  $< 0.01$ ) in *IRF1* sgRNA #1 cells, 71 of which were down-regulated  $>2$ -fold, whereas 1100 genes were down-regulated in *IRF1* sgRNA #2 cells (89  $>2$ -fold); 559 genes were up-regulated in *IRF1* sgRNA #1 cells (17  $>2$ -fold), and 871 genes in *IRF1* sgRNA #2 cells (48  $>2$ -fold). In aggregate, 48 genes were downregulated and 4 upregulated  $>2$ -fold in both *IRF1* sgRNA expressing cell lines, and not similarly regulated in *IRF3* sgRNA cells. (a) Scatter plots showing changes in relative transcript levels of genes in PH5CH8 cell lines expressing the two independent *IRF1* sgRNAs. Each symbol represents mean value of RNA transcript reads from 3 technical replicates. Note that genes reduced  $>2$ -fold are highly congruent (highlighted in the yellow area). (b) Volcano plots showing changes in relative RNA transcript abundance in the PH5CH8 cell lines expressing indicated sgRNAs. Each symbol represents mean value of RNA transcript reads from 3 technical replicates. The p-values were determined using the negative binomial Wald test. The p-values were adjusted using false discovery rate (FDR) correction.



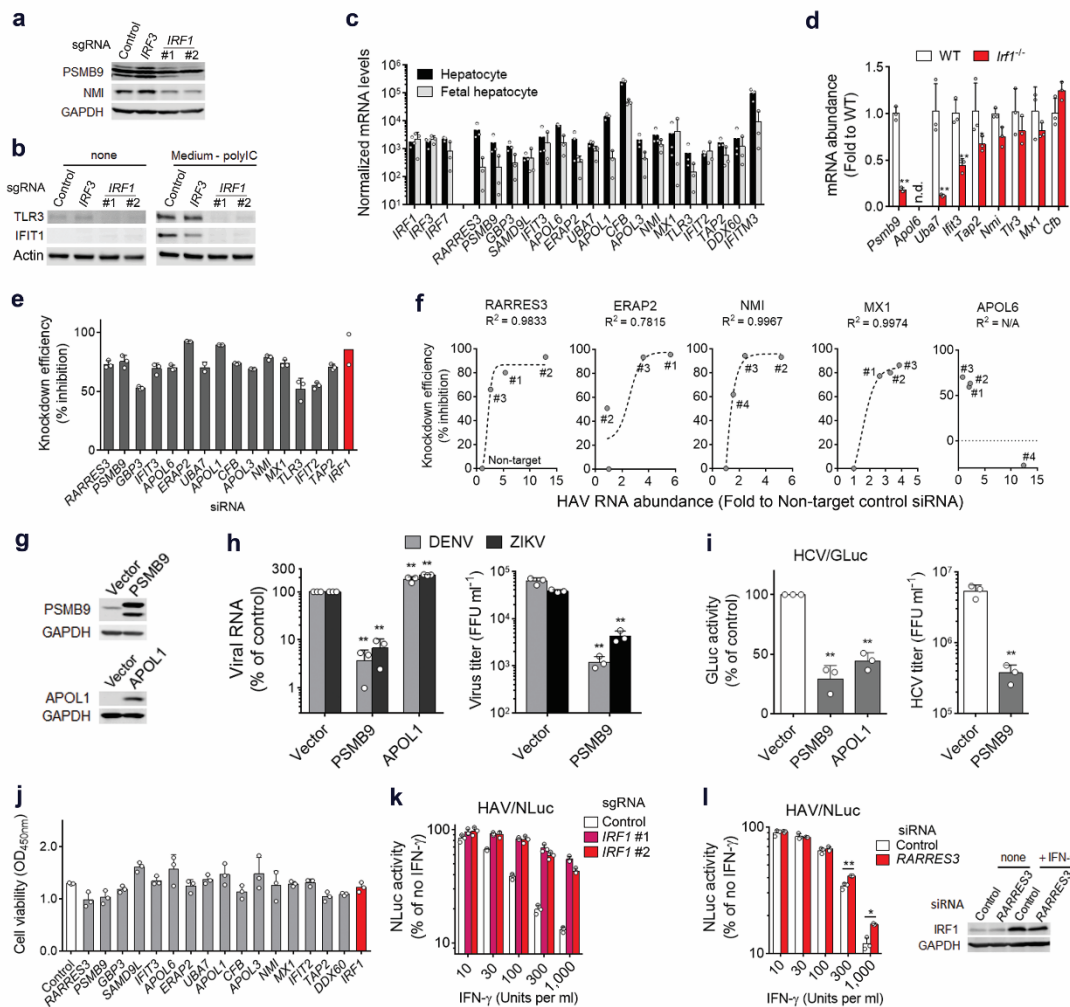

**Supplementary Figure 7. Antiviral activities of IRF1 target genes and their IRF1-dependent expression *in vitro* and *in vivo*.** (a) The basal protein expression of IRF1-regulated genes, PSMB9 and NMI, is reduced in PH5CH8 cells expressing *IRF1* sgRNAs. Data shown are representative of 2 independent experiments. (b) Both basal expression of TLR3 and TLR3-mediated induction of the ISG, IFIT1, in response to poly(I:C) added to culture medium (50  $\mu\text{g ml}^{-1}$  for 6 h) are impaired in *IRF1* sgRNA-expressing PH5CH8 cells. Data shown are representative of 2 independent experiments. (c) Abundance of basally-expressed *IRF1*, *IRF3*, *IRF7* and IRF1-responsive gene transcripts in primary adult human hepatocytes and human fetal hepatocytes. Values shown are means  $\pm$  s.d. from 3 independent donors and are from previously published data<sup>19</sup>. (d) Basal expression levels of select IRF1 target gene mRNAs are reduced in *Ifit1*<sup>-/-</sup> mouse liver tissues. Values shown are mean  $\pm$  s.d. of 3 animals. n.d., not detected. \*\* $p < 0.0001$  (*Psmb9*, *Uba7*),  $p = 0.0002$  (*Ifit3*), vs. WT (two-sided unpaired t-test). (e) Knockdown efficiency of IRF1 effector genes as assessed by quantitative RT-PCR or by immunoblot analysis for IRF1 protein shown in red. Values shown are means  $\pm$  s.d. from 3 technical replicates (RNA abundance) or from 2 biological replicates (IRF1 protein abundance). (f) Correlation between knockdown efficiency of individual siRNAs (Y-axis) versus replication enhancement of HAV RNA (X-axis). Each symbol represents a mean value from a single siRNA, each analyzed in 3 technical replicates. Nonlinear regression curves were fit according to a three-parameter model. (g) Immunoblots of PSMB9 and APOL1 expressed in Huh-7.5 cells stably transduced with indicated lentiviral vectors. Data shown are representative of two independent experiments. (h) Replication of flavivirus RNA and infectious virus titers at 24 h p.i. in Huh-7.5 cells expressing the indicated

genes. Values shown are means  $\pm$  s.d. from 3 independent experiments.  $**p < 0.0001$  vs. vector control (two-way ANOVA with Sidak's multiple comparisons test) (i) GLuc activities reflecting replication of JFH1-QL/GLuc virus on 3 d p.i. (left) and infectious titers of JFH1-QL virus on 3 day post RNA transfection (right) in Huh-7.5 cells expressing the indicated genes. Values shown are means  $\pm$  s.d. from 3 independent experiments.  $**p = 0.0002$  (GLuc, PSMB9),  $p = 0.0004$  (GLuc, APOL1),  $p = 0.0016$  (virus titer) vs. control (two-sided unpaired t-test) (j) Cell viability in Huh-7.5 cells transfected with indicated siRNAs directed to *IRF1* and its target genes as measured by WST-8 assay. Values shown are means  $\pm$  s.d. from 3 technical replicates. (k) IFN- $\gamma$ , an IRF1-agonist, restricts HAV replication via an IRF1-dependent mechanism. Note that the anti-HAV action of IFN- $\gamma$  is diminished in Huh-7.5 cell lines expressing two independent *IRF1* sgRNAs. Values shown are means  $\pm$  s.d. from 3 technical replicates and are representative of 2 independent experiments. (l) Depletion of RARRES3 partially attenuates the anti-HAV effect of overexpressed IRF1. Immunoblots of IRF1 and GAPDH are shown on right (IFN- $\gamma$ , 1,000 U ml $^{-1}$  for 24 h). Values shown are means  $\pm$  s.d. from 3 technical replicates and are representative of 3 independent experiments.  $*p = 0.0309$ ,  $**p = 0.005$  vs. control (two-way ANOVA with Dunnett's multiple comparisons test).

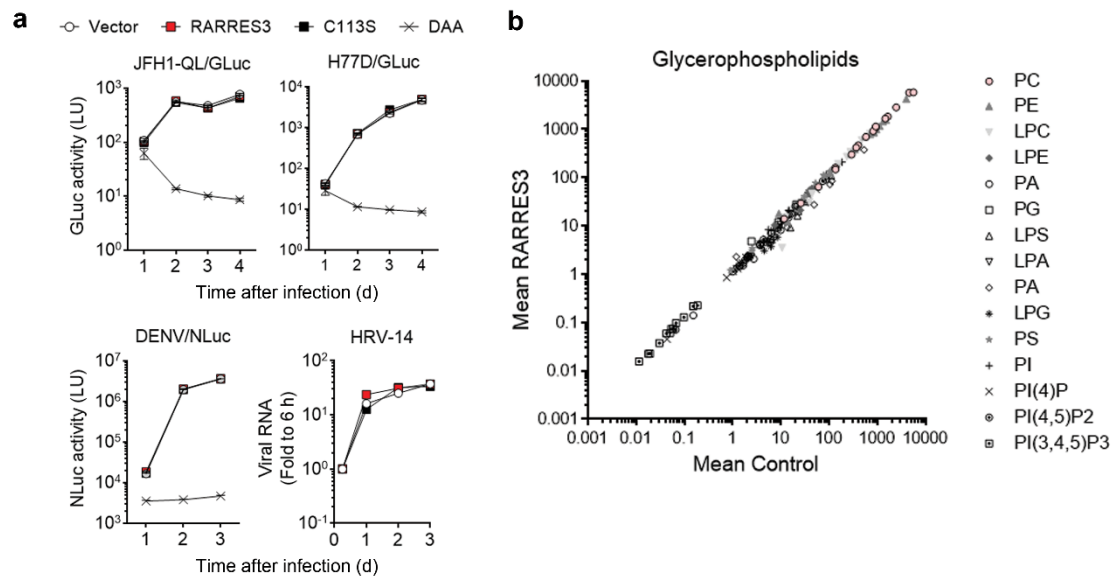

**Supplementary Figure 8. Effect of RARRES3 overexpression on replication of HCV, DENV and HRV-14, and cellular glycerophospholipid profiles in Huh-7.5 cells.** (a) Replication of HCV/GLuc (genotype 2a JFH1-QL and genotype 1a H77D), DENV/NLuc, or human rhinovirus 14 (HRV-14) in Huh-7.5 cells stably expressing empty vector, RARRES3, or RARRES3/C113S (catalytically inactive). DAA, sofosbuvir for HCV/GLuc or 2'CMA for DENV/NLuc (30  $\mu$ M each). Values shown are mean  $\pm$  s.d. from 3 technical replicates. (b) Glycerophospholipid profiles of Huh-7.5 cells stably expressing RARRES3 vs. empty vector control. Units are pmol per  $10^6$  cells. Values shown are mean  $\pm$  s.d. from 3 independent experiments.

**Supplementary Figure 9. Data for additional biological replicates.** (a-m) Number of experimental replicates and statistical tests are equivalent to that of the main figures.

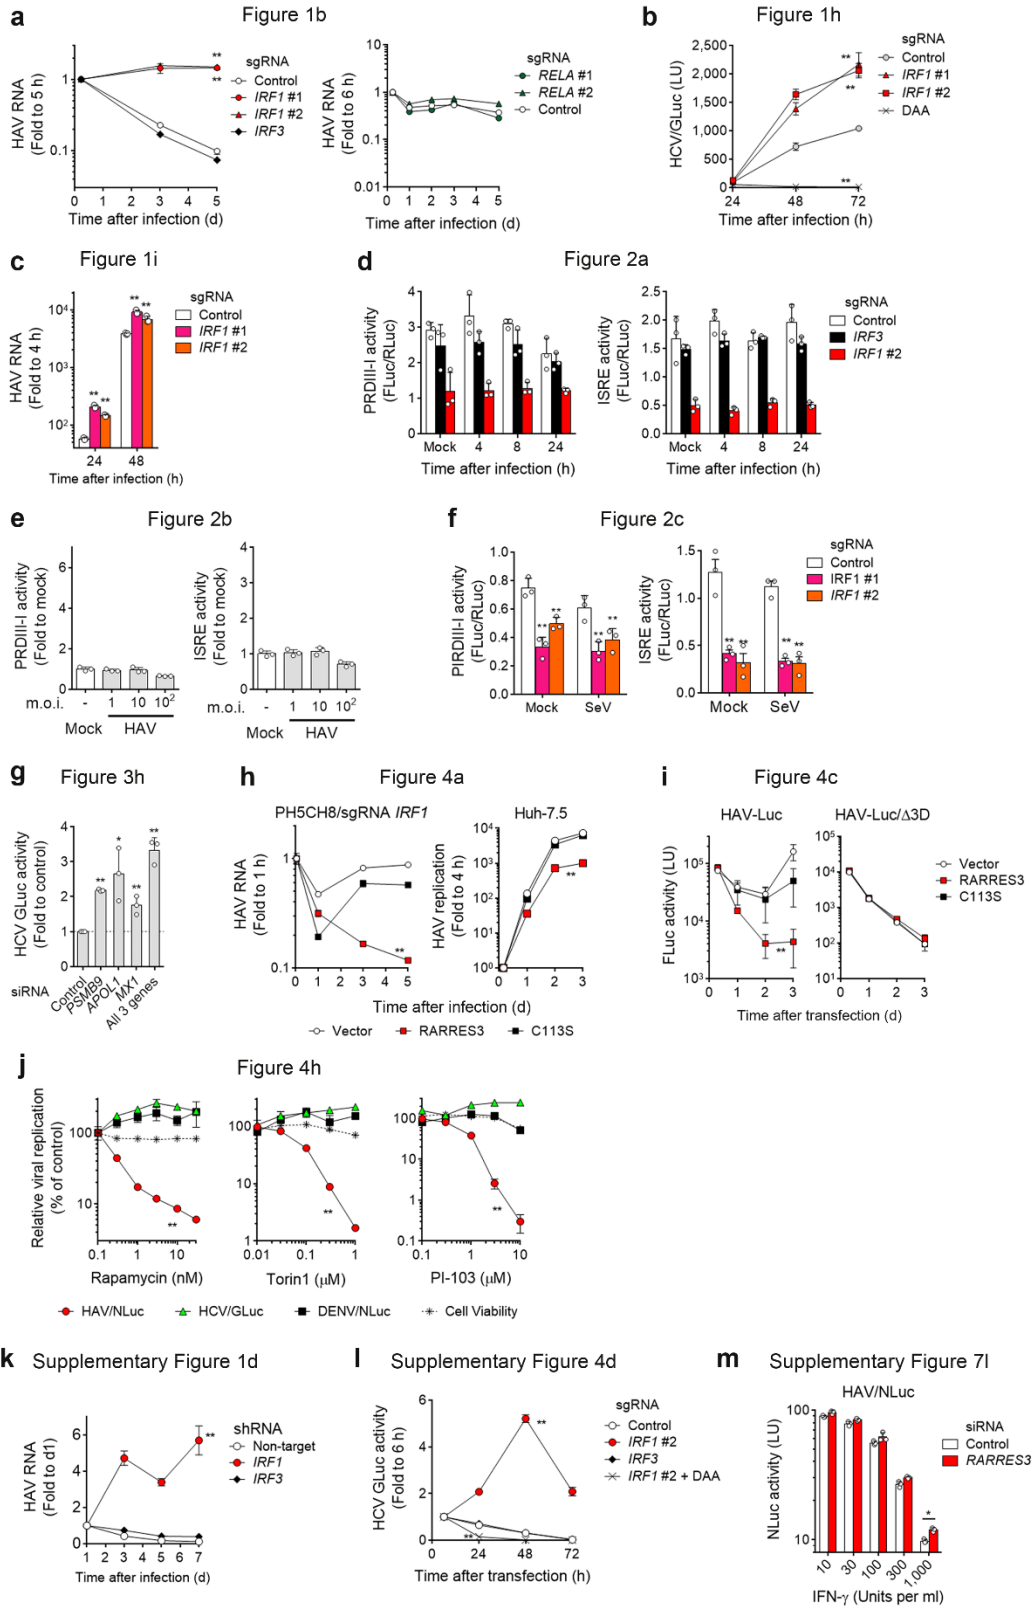

**Supplementary Figure 10. Uncropped blots.**

Boxes indicate the cropped areas shown in the indicated figures. Molecular weight is indicated in numbers.

Figure 1b

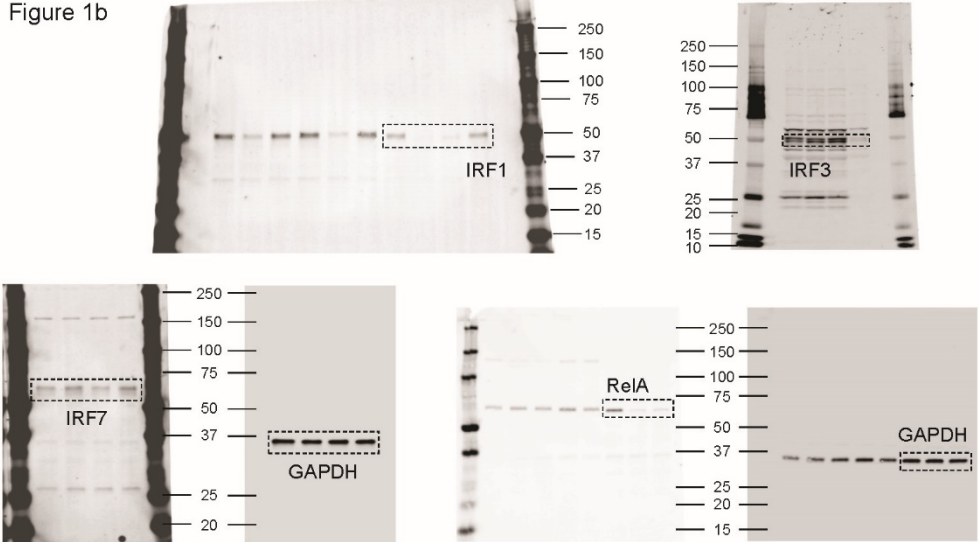

Figure 1d

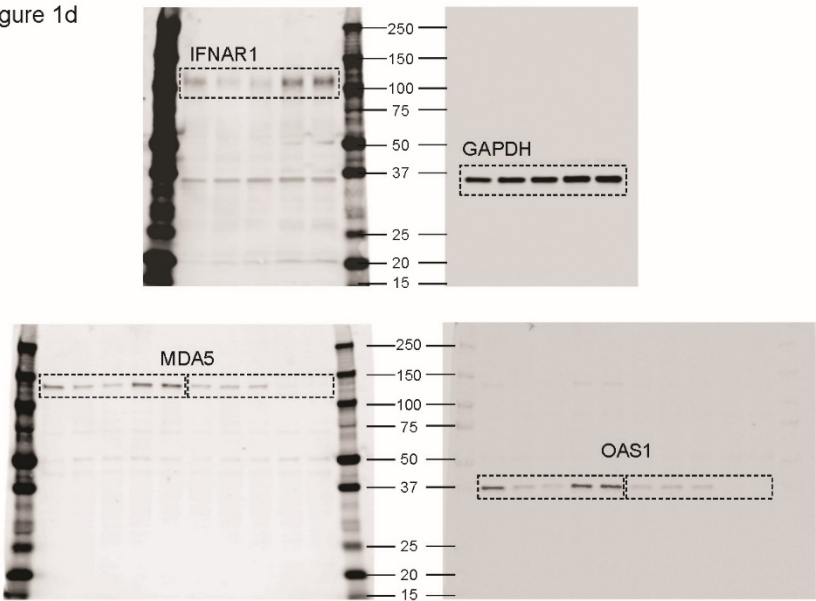

Figure 1e

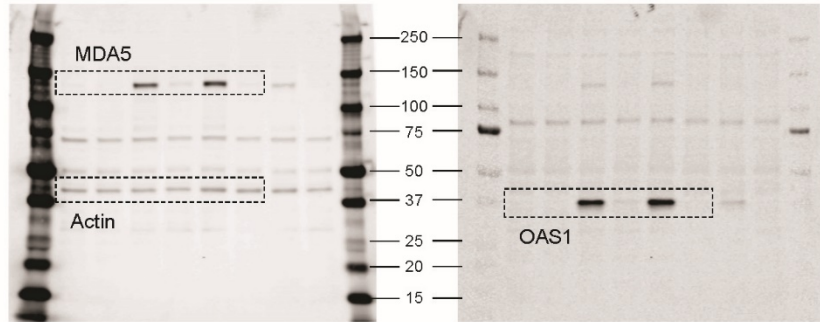

Figure 1g

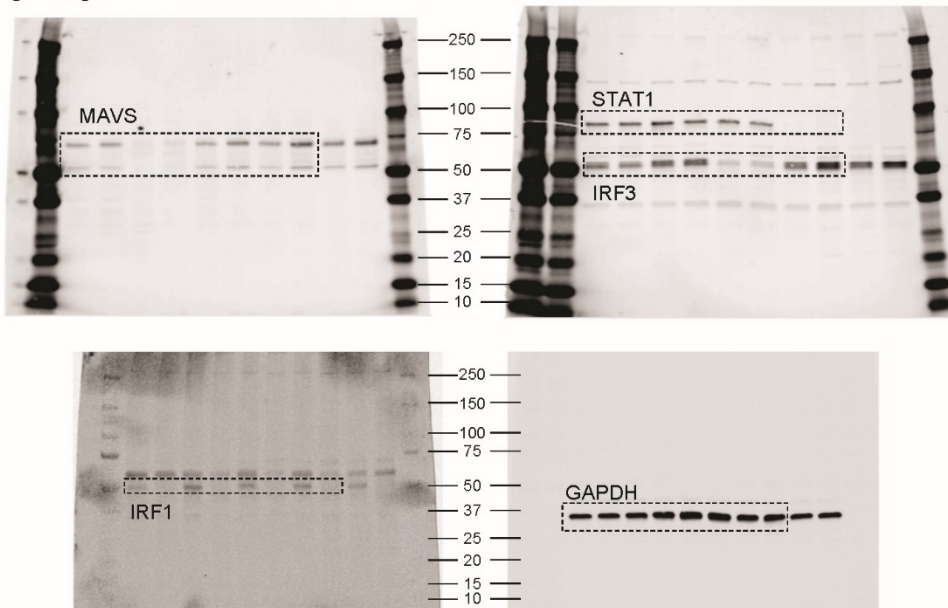

Figure 1h

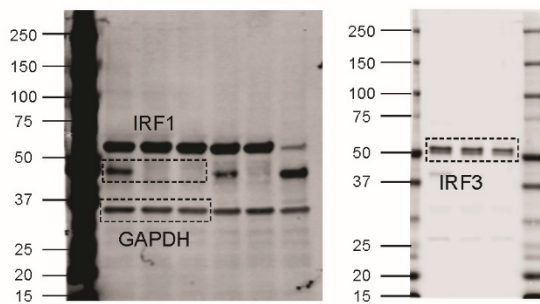

Figure 4a

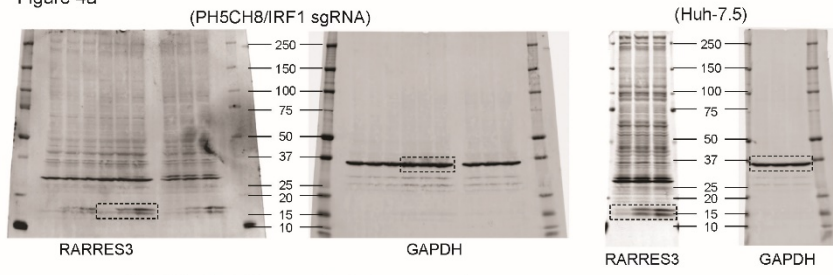

Figure 4d

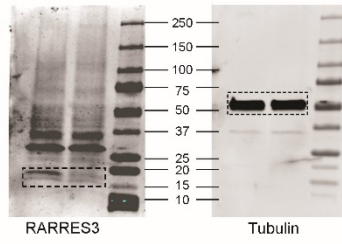

Figure 4e

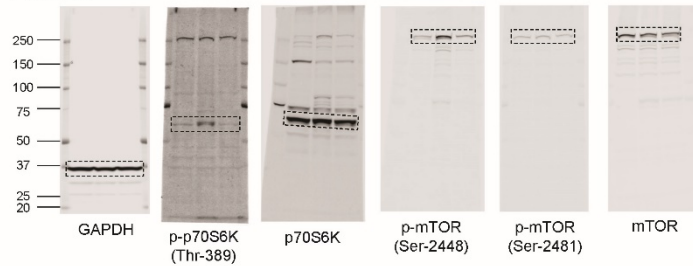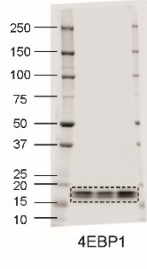

Figure 4f

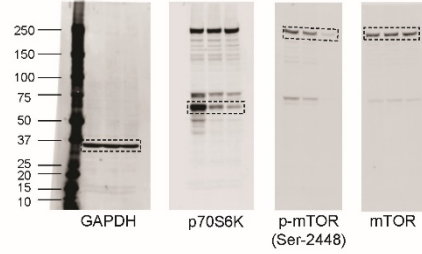

Figure 4g

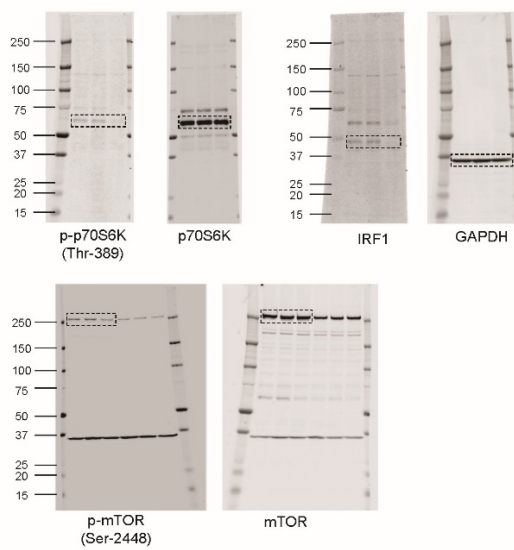

Supplementary Figure 1a

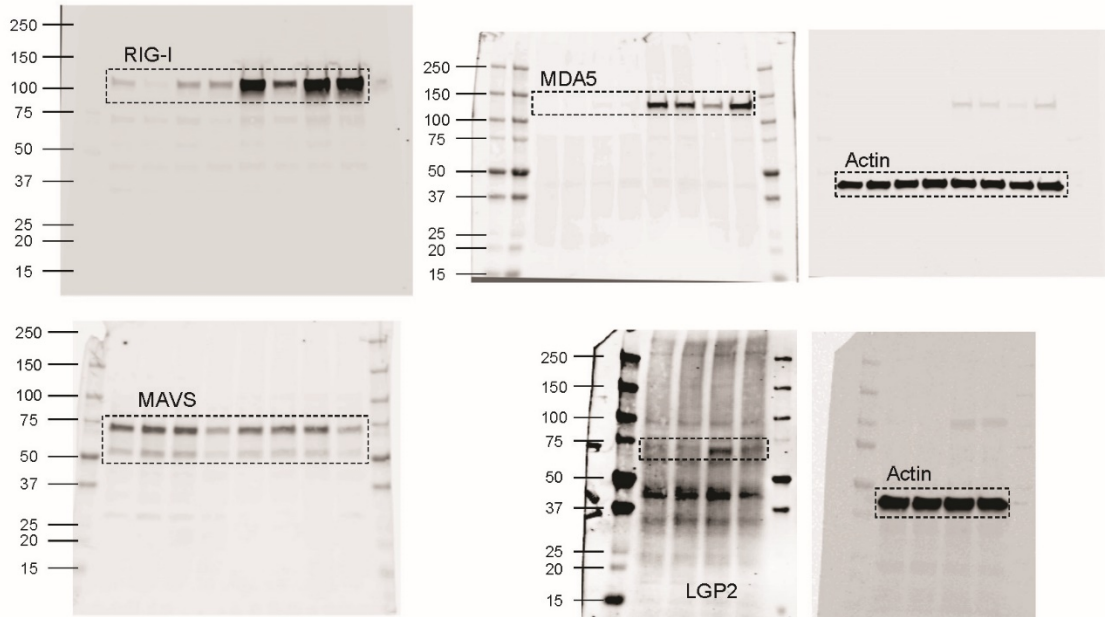

Supplementary Figure 1c

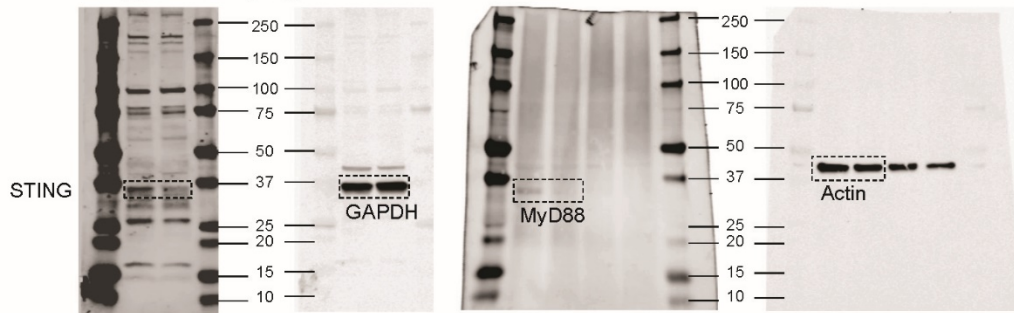

Supplementary Figure 1d

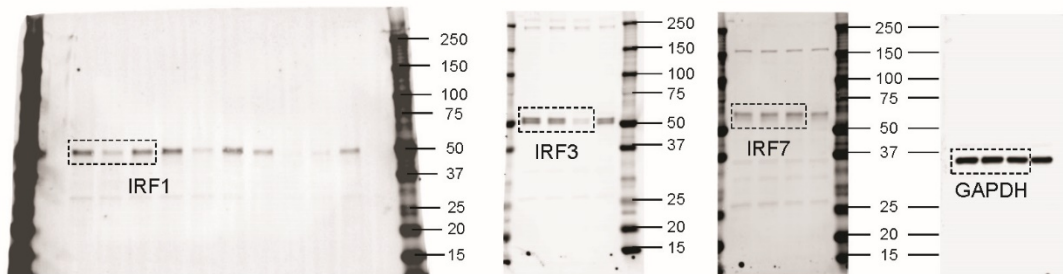



Supplementary Figure 1e

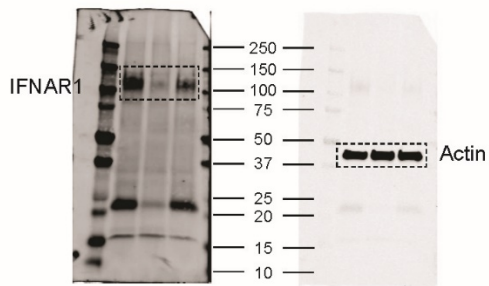

Supplementary Figure 1f

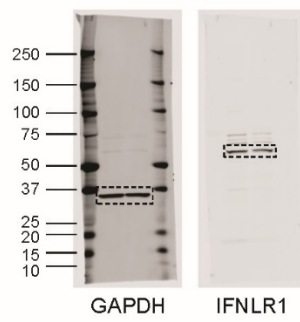

Supplementary Figure 2a

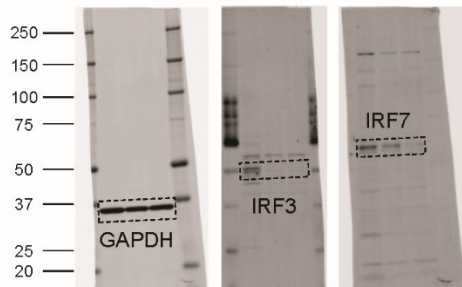

Supplementary Figure 2c

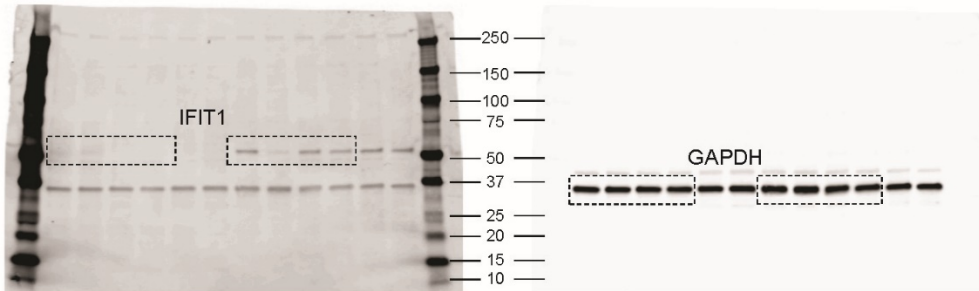

Supplementary Figure 2d

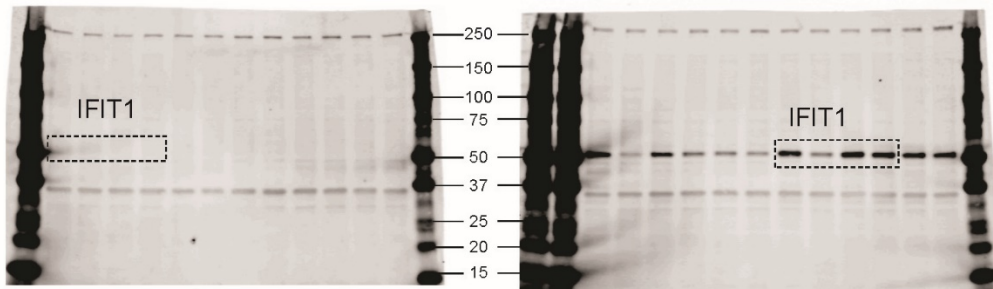

Supplementary Figure 2d

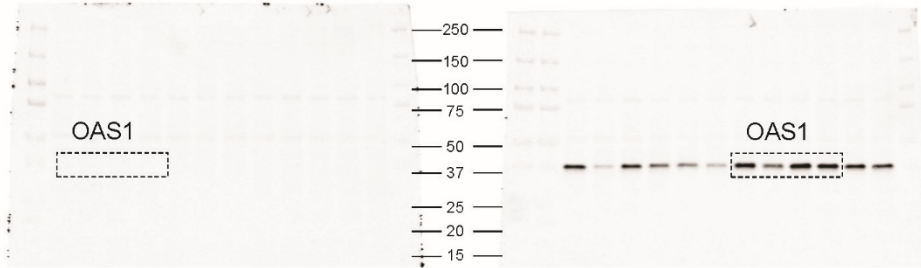

Supplementary Figure 2d

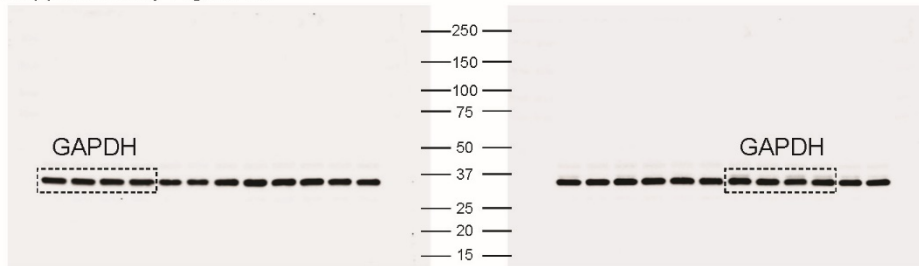

Supplementary Figure 2f

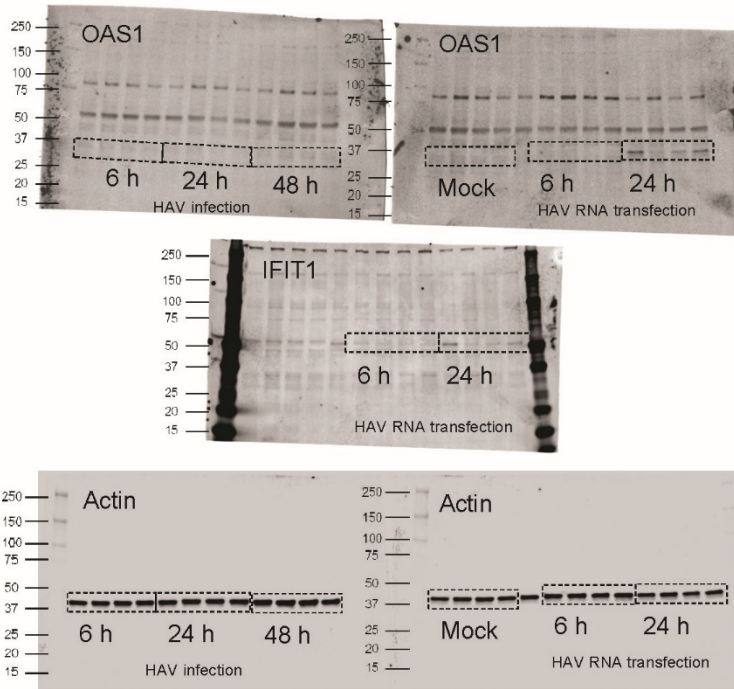

Supplementary Figure 5a

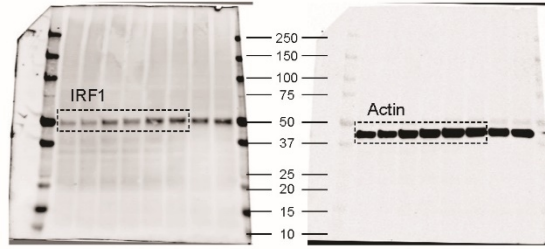

Supplementary Figure 7a

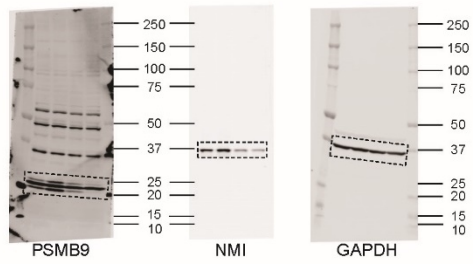

Supplementary Figure 7b

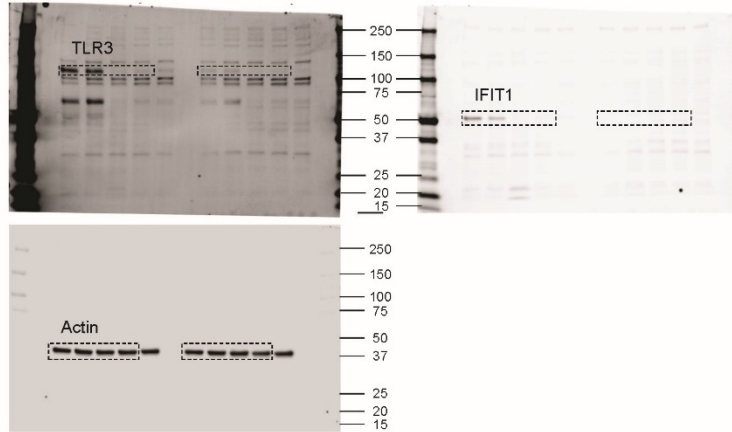

Supplementary Figure 7g

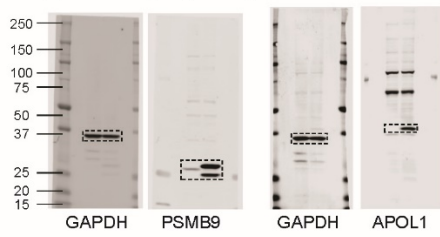

Supplementary Figure 7i

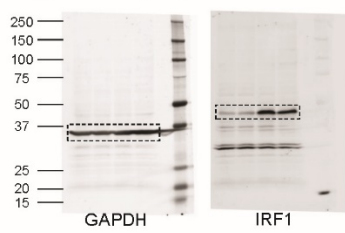

**Supplementary Table 1. Short hairpin RNAs used for knockdowns.**

| Target gene        | Target sequence        | Sigma catalog# or Clone ID |
|--------------------|------------------------|----------------------------|
| Non-target control | CAACAAGATGAAGAGCACCAA  | SHC002                     |
| RIG-I              | CCAGAATTATCCCAACCGATA  | NM_014314.2-505s1c1        |
| MDA5               | CCAACAAGAAGCAGTGTATA   | NM_022168.2-1565s1c1       |
| LGP2               | GCAAGAAGTGATCCAGAAGTT  | NM_024119.1-1483s1c1       |
| MAVS               | GCATCTCTTCAATACCCTTCA  | NM_020746.1-296s1c1        |
| STING              | GCAGAGCTATTTCCCTCCACA  | NM_198282.1-1472s1c1       |
| MYD88              | GCAGAGCAAGGAATGTGACTT  | NM_002468.2-723s1c1        |
| TRIF               | CTCCAACCTTTCTGTAGAAGAT | NM_014261.1-588s1c1        |
| IRF3               | GCCAACCTGGAAGAGGAATTT  | NM_001571.1-265s1c1        |
| IRF7               | GCTGGACGTGACCATCATGTA  | NM_001572.2-1156s1c1       |
| IRF1               | CGTGTGGATCTTGCCACATTT  | NM_002198.1-1769s1c1       |
| IFNAR1             | GTTGACTCATTACACCATTT   | NM_000629.2-496s1c1        |
| IFNLR1             | GCCGGAACAAGACCCTATTT   | NM_170743.2-512s1c1        |

**Supplementary Table 2. Single guide RNAs used for CRISPR/Cas9 knockouts.**

| Target gene        | Target sequence      |
|--------------------|----------------------|
| Non-target control | CACTCACATCGCTACATGA  |
| IRF1 (#1)          | GAAGCATGCTGCCAAGCA   |
| IRF1 (#2)          | GAGCCAGATCCCAAGACG   |
| IRF3               | AGTATTCTCCAGGGAGG    |
| IFNAR1 (#1)        | GCTGCGGACAACACCCA    |
| IFNAR1 (#3)        | GTTATGTGGGCTTTGGA    |
| IFNLR1 (#1)        | GCAGGAAGGCCATGGCG    |
| IFNLR1 (#2)        | GCAGGCCGCTCCAGGTA    |
| MAVS               | TATAAGTCCGAGGGCACCTT |
| STAT1              | GCAGCTTGACTCAAAATTCC |
| RELA (#1)          | CAATGATCTCCACATAG    |
| RELA (#3)          | CAATGATCTCCACATAG    |
| RARRES3            | GGTGATCATCAGTTCTGCGA |

**Supplementary Table 3. Oligonucleotide primers used for qRT-PCR of IRF1-target host genes.**

| Gene    | Forward                  | Reverse                  |
|---------|--------------------------|--------------------------|
| RARRES3 | GATTTTCCGCCTTGGCTATG     | TTGCTCAGGACTGAGAAGAC     |
| PSMB9   | GTGGATGCAGCATATAAGCC     | AGTGACCAGGTAGATGACAC     |
| APOL6   | CTATTGCTCCCAGGCTACGCA    | CCCTGCAAGCTCCATTTCGTAGT  |
| GBP3    | CGCACAGGAAAATCCTACCT     | ACACACCACATCCAGATTCC     |
| ERAP2   | GGGCCTCATTACATATAGGGA    | ATTCCATTGTGACCAGGTTG     |
| APOL1   | ATAATGAGGCCTGGAACGGA     | GGTTGTCCAGAGCTTTACGG     |
| SAMD9L  | AAGCTCTGAGAGCAGATAGG     | TTGAGTTTTGCTGCAGTAGG     |
| UBA7    | TGATGCCCTCGATTGTCTTC     | ACTTTGAGCAGCTCACAAAC     |
| IFIT3   | CTGGCAATTGCGATGTACCA     | GTTTCAGGCCCAAGAGAACC     |
| CXCL8   | AAGAGCCAGGAAGAAACCAC     | CTTGGCAAACTGCACCTTC      |
| NMI     | GGAGTTACAAGAGGCTACCA     | CGAGCTCACTTCAAACGAAC     |
| TLR3    | TAGCAAACACAAGCATTCCGG    | AGGAATCGTTACCAACCACA     |
| CFB     | TTCCCTGACAGAGACCATAG     | CTGTCTGATCCATCTAGCAC     |
| TAP2    | CCTCACTATTCTGGTCGTGT     | GATCCGCAAGTTGATTTCGAG    |
| IFIT2   | GAGAATTGCACTGCAACCATGAG  | CGATTCTGAAACTCAGTCCGGTAA |
| APOL3   | ATCCACACAGCTCAGAACAG     | CAGCAAATGCCAAGACCAAC     |
| MX1     | CAGTTACCAGGACTACGAGA     | GGGTGATTAGCTCATGACTG     |
| DDX60   | CTTCTATCTGGTTGAACGCT     | CAGGGAAGTTGAAATACGCA     |
| ZNF827  | AATCGGGCGAGAGAAAACCGAA   | GACAGTTGAAAGAGGAGCTCGGAA |
| CXCL1   | ATTCACCCCAAGAACATCCA     | CAGGATTGAGGCAAGCTTTC     |
| FYN     | CAATGAGTACACAGCAAGAC     | AGCTCTGTGAGTAAGATTCC     |
| TENM3   | GACAGCTCCAAACAGTTTACCTCA | TGTCTCGCAGGTCATAGCGAA    |
| COL4A1  | GCCTGGTGAAGTTTTATTTGAC   | ACGCTCTCCTTTCAATCCTAC    |
| COL4A2  | GGTTTCTACGGAGTTAAGGG     | TTCACCCTTGTACTGATCTG     |
| DPYSL3  | GAGCAAACCCGCATGTTGGA     | GCAATGGTGTGATGGCACGGAA   |
| ACTB    | GACCCAGATCATGTTTGAGACC   | GTCACCGGAGTCCATCACGA     |

**Supplementary Table 4. siRNAs used for gene silencing.**

| Gene Symbol           | Gene      | Sequence             |                      |
|-----------------------|-----------|----------------------|----------------------|
| RARRES3               | NM_004585 | GCACUGGGCCUGUAUUA    | UAUGGCAAGUCCCGCUGUA  |
|                       |           | CAACAGUGCAGAGGUGAAA  | CGAAGGAGAUGGUUGGUCA  |
| PSMB9                 | NM_148954 | GCAAAUGUGGUGAGAAUA   | GAACCGAGUGUUUGACAAG  |
|                       |           | GGCAGCACCUUUUAUCUAUG | ACGUGAAGGAGGUCAGGUA  |
| GBP3                  | NM_018284 | GAGAAGACCCUCACUAGUA  | CCACUGAAGUCUAUAUGAA  |
|                       |           | GAACAGGCCCGAGUACUAA  | CGCAUAAGCUAAAGAUCUA  |
| SAMD9L                | NM_152703 | GGAAGGGUCUAAACAGUAU  | GUAGGAGCAUUACUGUUAA  |
|                       |           | GCAACGGGAUGUAGAUUUC  | CAGAAAAGGAUUUGCGUAU  |
| IFIT3                 | NM_001549 | GCAAU AUGCUAUGGACUAU | GACUGGCAAUUGCGAUGUA  |
|                       |           | GAGACGGAUGUUAUCAGA   | UAGAGUGUGUAACCAGAUU  |
| APOL6                 | NM_030641 | GAGAGAAUUUCCAGAUUG   | AGAAACACCUUGAAGUAUG  |
|                       |           | GAACAACACUGGCGAUGAC  | GGGAAGUGGGAGUCGAACA  |
| ERAP2                 | NM_022350 | GAAAGCUGCUGAACUCUUC  | GAUCAUCUCUGGCACAACA  |
|                       |           | GAGUAGGUCUGAUUCAUGA  | GAUCACAUCUGGAUUAUUU  |
| UBA7                  | NM_003335 | GAACAAAGCCCUGGAAGUC  | GGGCAGUGCUCACAGUAUUC |
|                       |           | GCACUUCCACCUAUAAA    | UGAAGCCUCUGAUUUUGA   |
| APOL1                 | NM_003661 | GUUCCAAGUGGGACAGUA   | ACGAUAAAGGCCAGCAGUA  |
|                       |           | AGAAUAUAUUGACGGAAGA  | AAUGGGAACUGGAGAGUGU  |
| CFB                   | NM_001710 | CGAAGCAGCUCAAUGAAAU  | GGAGAUAGAAGUAGUCCUA  |
|                       |           | ACACGUACCUGCAGAUUA   | ACAGGAAGGGUACCGAUUA  |
| APOL3                 | NM_145640 | GGUCAAGCAGAGAGAACGA  | CAACCUUGUAUACGAGUCA  |
|                       |           | CAACCAGCAUUGACCGAUU  | CCUGUGACCACCUGGCGAA  |
| NMI                   | NM_004688 | CCAAAGAAUCCAGAUUAA   | GCUCGAAAGUCCUUAUGA   |
|                       |           | CAAGUGAGCUCGAAAGUUC  | CGAAAGUCCUUAUGAGAU   |
| MX1                   | NM_002462 | UCACAGAUGUUUCGAUAAA  | GAAUGGAAUCAGUCAUGA   |
|                       |           | CCACAAAUGGAGUACAUA   | CGACAUACCGGAAGACGAA  |
| TLR3                  | NM_003265 | GAAGCUAUGUUUGGAAUUA  | GAAGAGGAAUGUUUAAAUC  |
|                       |           | GAUCAUCGAUUUAGGAUUG  | CAACAUAGCCAACAUAAA   |
| IFIT2                 | NM_001547 | CAAUUGGGUGCUGCUAUA   | GGAGAAAGCCCAGGUGUA   |
|                       |           | GCAAAAGUCUCCAAGUAA   | GAACUAAUAGGACACGCUG  |
| TAP2                  | NM_018833 | GUAACUGGCUUCCUUAUAA  | CAUGAAGUCUGUCGCUAUA  |
|                       |           | GGAAUUGGAGCAUGGAAUA  | GAAACAACGUCUGGCCAUU  |
| DDX60                 | NM_017631 | GAAGGUAAUUGGUCGAGUA  | GCACUCACCAUUAUUAUCUA |
|                       |           | GGAGAGAGGUAAUUAUGAUC | AAAUGUCGCUAAUUGCCUA  |
| RPS6KB1               | NM_003161 | GGACUAUGCAAAGAAUCUA  | GGUUUUUCAAGUACGAAAA  |
| IRF7                  | NM_001572 | GUCUAAUGAGAACUCCAGA  | GCCUAGAACCCAGUCUAAU  |
| IRF1                  | NM_002198 | UCACAGAUCUGAAGAACAU  | CCAAGAACCAGAGAAAAGA  |
| Non-targeting Control | N/A       | UAGCGACUAAACACAUCAA  | AUGUAUUGGCCUGUAUUAG  |
|                       |           | UAAGGCUAUGAAGAGAUAC  | AUGAACGUGAAUUGCUCAA  |

**Supplementary Table 5. Differentially expressed genes (> 1.0 log<sub>2</sub>) in PH5CH8 cells transduced with 2 independent sgRNAs targeting *IRF1*.**

The differential mRNA expression in the sgRNA-expressing cells grown in triplicate compared to control was determined using DESeq2. The p-values were determined using the negative binomial Wald test. The p-values were adjusted using false discovery rate (FDR) correction.

**a. Differentially expressed genes (> 1.0 log<sub>2</sub>) in PH5CH8 cells transduced with *IRF1* #1 sgRNA.**

| Down-regulated genes |           |                 |           | Up-regulated genes |          |                 |          |
|----------------------|-----------|-----------------|-----------|--------------------|----------|-----------------|----------|
| Rank                 | Gene      | Log2 Foldchange | padj      | Rank               | Gene     | Log2 Foldchange | padj     |
| 1                    | RARRES3   | -4.30605607     | 0         | 51                 | BIRC3    | -1.173786664    | 2.40E-28 |
| 2                    | PSMB9     | -3.070227661    | 4.01E-141 | 52                 | ATP10D   | -1.171899468    | 3.06E-22 |
| 3                    | APOL6     | -2.618325001    | 3.61E-173 | 53                 | IFIH1    | -1.171377019    | 7.87E-18 |
| 4                    | GBP3      | -2.564265161    | 2.41E-85  | 54                 | SOD2     | -1.168138821    | 9.89E-75 |
| 5                    | ERAP2     | -2.545561012    | 7.42E-212 | 55                 | HPGD     | -1.141701789    | 6.97E-38 |
| 6                    | APOL1     | -2.518894585    | 0         | 56                 | IL15     | -1.124268707    | 3.62E-17 |
| 7                    | SAMD9L    | -2.509506919    | 2.56E-81  | 57                 | OAS1     | -1.121088971    | 1.04E-20 |
| 8                    | UBA7      | -2.449501879    | 6.30E-135 | 58                 | FOSL1    | -1.106411339    | 8.16E-48 |
| 9                    | IFIT3     | -2.339444768    | 6.62E-103 | 59                 | OAS3     | -1.105874085    | 1.41E-66 |
| 10                   | CXCL8     | -2.238182461    | 1.24E-117 | 60                 | TNFAIP3  | -1.099669587    | 1.88E-28 |
| 11                   | NMI       | -2.150694321    | 1.51E-78  | 61                 | CXCL2    | -1.094667802    | 1.36E-15 |
| 12                   | TLR3      | -2.085901887    | 2.44E-54  | 62                 | TNFRSF14 | -1.070706215    | 1.03E-15 |
| 13                   | CFB       | -1.949049961    | 1.39E-78  | 63                 | NFIX     | -1.052325125    | 5.38E-15 |
| 14                   | C3        | -1.917893461    | 6.57E-118 | 64                 | TRABD2A  | -1.029835611    | 3.43E-13 |
| 15                   | MEG3      | -1.893786333    | 1.29E-44  | 65                 | TRANK1   | -1.024365993    | 2.22E-26 |
| 16                   | PSMB8     | -1.885590966    | 1.53E-135 | 66                 | TM4SF18  | -1.023442793    | 2.86E-16 |
| 17                   | TAP2      | -1.876453474    | 3.35E-160 | 67                 | GLUL     | -1.02290644     | 1.20E-36 |
| 18                   | FGB       | -1.870468009    | 5.95E-92  | 68                 | ACTA2    | -1.019950576    | 7.18E-13 |
| 19                   | IFIT2     | -1.793546489    | 1.29E-52  | 69                 | STARD4   | -1.011659171    | 1.78E-14 |
| 20                   | APOL3     | -1.754325695    | 3.44E-38  | 70                 | OSBPL6   | -1.011470949    | 1.11E-14 |
| 21                   | DDX60     | -1.750967907    | 1.70E-44  | 71                 | DTNA     | -1.008331529    | 1.53E-12 |
| 22                   | MX1       | -1.748456819    | 7.04E-56  |                    |          |                 |          |
| 23                   | PARP10    | -1.706256534    | 6.50E-75  |                    |          |                 |          |
| 24                   | ZNF827    | -1.657126982    | 1.64E-34  |                    |          |                 |          |
| 25                   | CXCL1     | -1.654437285    | 1.46E-49  |                    |          |                 |          |
| 26                   | IRF1      | -1.620030816    | 4.90E-125 |                    |          |                 |          |
| 27                   | FYN       | -1.584149049    | 3.32E-38  |                    |          |                 |          |
| 28                   | BTN3A3    | -1.561734794    | 1.23E-66  |                    |          |                 |          |
| 29                   | UBE2L6    | -1.555460225    | 7.92E-70  |                    |          |                 |          |
| 30                   | AASS      | -1.555233906    | 8.60E-30  |                    |          |                 |          |
| 31                   | PARP14    | -1.525757089    | 5.70E-120 |                    |          |                 |          |
| 32                   | HLA-B     | -1.499518883    | 5.89E-83  |                    |          |                 |          |
| 33                   | UBD       | -1.489687126    | 6.91E-28  |                    |          |                 |          |
| 34                   | VCAM1     | -1.486441985    | 4.53E-119 |                    |          |                 |          |
| 35                   | PARP12    | -1.46314127     | 5.34E-66  |                    |          |                 |          |
| 36                   | PSMB10    | -1.433041032    | 5.56E-45  |                    |          |                 |          |
| 37                   | ERAP1     | -1.410032105    | 1.80E-63  |                    |          |                 |          |
| 38                   | PSMB8-AS1 | -1.386597048    | 1.39E-23  |                    |          |                 |          |
| 39                   | TNFAIP2   | -1.337873899    | 8.94E-171 |                    |          |                 |          |
| 40                   | TRIM22    | -1.328653068    | 7.17E-22  |                    |          |                 |          |
| 41                   | FGG       | -1.287772344    | 2.18E-20  |                    |          |                 |          |
| 42                   | ACSL5     | -1.284806127    | 2.98E-24  |                    |          |                 |          |
| 43                   | LGALS9    | -1.266127198    | 7.66E-20  |                    |          |                 |          |
| 44                   | CCL2      | -1.263565625    | 8.71E-65  |                    |          |                 |          |
| 45                   | CTSS      | -1.253522216    | 3.32E-21  |                    |          |                 |          |
| 46                   | DDX60L    | -1.238249346    | 1.04E-20  |                    |          |                 |          |
| 47                   | MUC5AC    | -1.197902994    | 2.50E-18  |                    |          |                 |          |
| 48                   | DTX3L     | -1.195713255    | 3.57E-64  |                    |          |                 |          |
| 49                   | NT5E      | -1.190971531    | 5.81E-26  |                    |          |                 |          |
| 50                   | TAP1      | -1.183769535    | 4.20E-72  |                    |          |                 |          |

**b. Differentially expressed genes (> 1.0 log<sub>2</sub>) in PH5CH8 cells transduced with *IRF1* #2 sgRNA.**

| Down-regulated genes |             |                 |           | Up-regulated genes |          |                 |          |
|----------------------|-------------|-----------------|-----------|--------------------|----------|-----------------|----------|
| Rank                 | Gene        | Log2 Foldchange | padj      | Rank               | Gene     | Log2 Foldchange | padj     |
| 1                    | RARRES3     | -3.9797151      | 0         | 51                 | PARP14   | -1.31951145     | 2.52E-91 |
| 2                    | PSMB9       | -3.04157472     | 8.92E-125 | 52                 | LRP3     | -1.3062438      | 4.12E-20 |
| 3                    | FYN         | -2.71569318     | 2.62E-81  | 53                 | BMP5     | -1.28266879     | 1.52E-67 |
| 4                    | GBP3        | -2.62753909     | 3.15E-74  | 54                 | DPYD     | -1.27776913     | 2.74E-25 |
| 5                    | SAMD9L      | -2.55223866     | 2.28E-69  | 55                 | NFIX     | -1.27482521     | 6.81E-18 |
| 6                    | EPHA3       | -2.38994137     | 4.93E-171 | 56                 | FBN1     | -1.26243065     | 2.79E-40 |
| 7                    | CXCL8       | -2.38385062     | 1.04E-123 | 57                 | OSBPL6   | -1.24682701     | 8.68E-16 |
| 8                    | IFIT3       | -2.32135177     | 1.57E-91  | 58                 | PSMB8    | -1.23399641     | 2.20E-65 |
| 9                    | CFB         | -2.16384796     | 5.17E-88  | 59                 | FGG      | -1.20962596     | 2.21E-14 |
| 10                   | APOL3       | -2.16271531     | 3.06E-43  | 60                 | CXCL2    | -1.20073982     | 2.52E-15 |
| 11                   | MX1         | -2.13538021     | 1.05E-71  | 61                 | DMKN     | -1.19809836     | 5.65E-51 |
| 12                   | UBA7        | -2.08939534     | 3.48E-99  | 62                 | ELOVL7   | -1.19603982     | 2.35E-14 |
| 13                   | ERAP2       | -2.04585084     | 1.11E-149 | 63                 | BCAT1    | -1.19072612     | 5.68E-15 |
| 14                   | BCHE        | -2.01280126     | 4.23E-122 | 64                 | DDX26B   | -1.18319328     | 2.66E-13 |
| 15                   | APOL6       | -1.97748878     | 6.57E-117 | 65                 | TRANK1   | -1.17545729     | 2.57E-30 |
| 16                   | APOL1       | -1.91956954     | 1.93E-270 | 66                 | ACSL5    | -1.16641946     | 1.41E-17 |
| 17                   | CDH6        | -1.85291099     | 1.93E-53  | 67                 | SLC16A7  | -1.16012119     | 1.54E-16 |
| 18                   | CXCL1       | -1.8376753      | 1.49E-55  | 68                 | PCDH18   | -1.14546803     | 7.43E-13 |
| 19                   | MEG3        | -1.83584728     | 4.08E-34  | 69                 | MARCKS   | -1.14163347     | 1.72E-30 |
| 20                   | ZNF827      | -1.7999967      | 1.20E-32  | 70                 | BCO1     | -1.10058789     | 2.39E-11 |
| 21                   | TLR3        | -1.77443867     | 3.89E-33  | 71                 | RNF217   | -1.09514509     | 2.48E-11 |
| 22                   | AMPH        | -1.77178777     | 3.33E-45  | 72                 | PCDH10   | -1.07378563     | 1.18E-12 |
| 23                   | NMI         | -1.74529971     | 1.91E-56  | 73                 | DDX60L   | -1.07228272     | 2.53E-12 |
| 24                   | PSMB10      | -1.743854       | 2.90E-58  | 74                 | TRABD2A  | -1.0700364      | 1.80E-11 |
| 25                   | TMPRSS15    | -1.72236919     | 1.43E-131 | 75                 | GREM1    | -1.05714764     | 6.94E-60 |
| 26                   | UBE2L6      | -1.71979678     | 2.39E-79  | 76                 | HMCN1    | -1.05126845     | 2.89E-83 |
| 27                   | DDX60       | -1.69922312     | 5.41E-37  | 77                 | IL15RA   | -1.04574927     | 5.04E-12 |
| 28                   | PVRL3       | -1.68958306     | 2.62E-33  | 78                 | IFIH1    | -1.04323298     | 3.07E-10 |
| 29                   | IFIT2       | -1.67977636     | 1.40E-41  | 79                 | SLITRK3  | -1.03910218     | 1.11E-10 |
| 30                   | UBD         | -1.6555172      | 2.47E-25  | 80                 | CD74     | -1.03828198     | 3.28E-10 |
| 31                   | FGB         | -1.61005657     | 2.42E-65  | 81                 | ATP10D   | -1.02983714     | 8.96E-16 |
| 32                   | TAP2        | -1.57984539     | 2.36E-136 | 82                 | HIST1H1C | -1.02772643     | 4.08E-34 |
| 33                   | LGALS9      | -1.56133472     | 2.05E-23  | 83                 | PGM5     | -1.02542065     | 3.93E-10 |
| 34                   | PCDH7       | -1.53276464     | 5.30E-23  | 84                 | PTX3     | -1.02480435     | 1.43E-10 |
| 35                   | BTN3A3      | -1.50838594     | 1.84E-58  | 85                 | ST3GAL1  | -1.0215178      | 1.91E-17 |
| 36                   | VANGL2      | -1.50397963     | 7.12E-23  | 86                 | MX2      | -1.01047767     | 1.19E-09 |
| 37                   | C3          | -1.48301596     | 6.14E-72  | 87                 | HLA-B    | -1.00132638     | 1.25E-40 |
| 38                   | IL15        | -1.46681703     | 5.72E-21  | 88                 | DTNA     | -1.00092823     | 1.55E-09 |
| 39                   | CTSS        | -1.45305055     | 9.51E-23  | 89                 | KCTD12   | -1.00005731     | 1.88E-09 |
| 40                   | KIAA1211    | -1.43382356     | 7.58E-20  |                    |          |                 |          |
| 41                   | PSMB8-AS1   | -1.42295053     | 2.25E-19  |                    |          |                 |          |
| 42                   | TRIM22      | -1.4155635      | 9.97E-19  |                    |          |                 |          |
| 43                   | TNFAIP2     | -1.39922336     | 8.11E-194 |                    |          |                 |          |
| 44                   | PCOLCE2     | -1.39911257     | 1.92E-18  |                    |          |                 |          |
| 45                   | PTN         | -1.34105797     | 2.24E-41  |                    |          |                 |          |
| 46                   | VCAM1       | -1.33887411     | 1.01E-102 |                    |          |                 |          |
| 47                   | CBLN2       | -1.33755103     | 4.65E-35  |                    |          |                 |          |
| 48                   | PIK3AP1     | -1.32320088     | 2.73E-19  |                    |          |                 |          |
| 49                   | CCL2        | -1.31961393     | 5.60E-67  |                    |          |                 |          |
| 50                   | PARP10      | -1.31952853     | 5.93E-46  |                    |          |                 |          |
| 1                    | TENM3       | 2.59907996      | 8.19E-171 |                    |          |                 |          |
| 2                    | DPYSL3      | 2.3470478       | 8.35E-240 |                    |          |                 |          |
| 3                    | COL4A2      | 1.98925264      | 1.00E-278 |                    |          |                 |          |
| 4                    | CPS1        | 1.87126782      | 3.85E-38  |                    |          |                 |          |
| 5                    | ADAP2       | 1.68675434      | 1.63E-29  |                    |          |                 |          |
| 6                    | ST6GAL2     | 1.65957594      | 1.54E-28  |                    |          |                 |          |
| 7                    | COL4A1      | 1.63883655      | 4.11E-171 |                    |          |                 |          |
| 8                    | TRPM2       | 1.62428886      | 7.93E-25  |                    |          |                 |          |
| 9                    | APBB1IP     | 1.58385023      | 2.14E-23  |                    |          |                 |          |
| 10                   | PLAC8       | 1.50945035      | 5.01E-36  |                    |          |                 |          |
| 11                   | CDA         | 1.49642137      | 1.08E-34  |                    |          |                 |          |
| 12                   | L1CAM       | 1.46939018      | 8.21E-198 |                    |          |                 |          |
| 13                   | MYO7A       | 1.41126263      | 8.11E-29  |                    |          |                 |          |
| 14                   | TIMP3       | 1.40930019      | 4.88E-53  |                    |          |                 |          |
| 15                   | MALRD1      | 1.38551206      | 9.89E-40  |                    |          |                 |          |
| 16                   | GADL1       | 1.38265219      | 3.32E-20  |                    |          |                 |          |
| 17                   | FMOD        | 1.34811809      | 3.36E-22  |                    |          |                 |          |
| 18                   | F10         | 1.34602364      | 2.66E-17  |                    |          |                 |          |
| 19                   | SPOCK1      | 1.34139016      | 3.17E-99  |                    |          |                 |          |
| 20                   | NOTUM       | 1.32299038      | 6.06E-20  |                    |          |                 |          |
| 21                   | ITGA11      | 1.3187266       | 3.42E-16  |                    |          |                 |          |
| 22                   | HOXC12      | 1.28245386      | 1.75E-15  |                    |          |                 |          |
| 23                   | FAM49A      | 1.26821737      | 3.86E-15  |                    |          |                 |          |
| 24                   | TNC         | 1.26275069      | 2.39E-106 |                    |          |                 |          |
| 25                   | PTGS1       | 1.2390419       | 1.37E-21  |                    |          |                 |          |
| 26                   | ADM2        | 1.23305933      | 9.56E-15  |                    |          |                 |          |
| 27                   | TCF21       | 1.23102459      | 2.40E-14  |                    |          |                 |          |
| 28                   | APCDD1L-AS1 | 1.22639092      | 4.29E-65  |                    |          |                 |          |
| 29                   | NDRG1       | 1.20209538      | 5.54E-62  |                    |          |                 |          |
| 30                   | B3GALT5     | 1.18919321      | 6.85E-16  |                    |          |                 |          |
| 31                   | ARFGEF3     | 1.18884895      | 1.24E-13  |                    |          |                 |          |
| 32                   | APCDD1L     | 1.1668644       | 1.84E-58  |                    |          |                 |          |
| 33                   | PCDHGA4     | 1.13357058      | 2.43E-12  |                    |          |                 |          |
| 34                   | CPM         | 1.12043845      | 3.43E-13  |                    |          |                 |          |
| 35                   | ENG         | 1.11392435      | 1.46E-45  |                    |          |                 |          |
| 36                   | IL20RA      | 1.11267656      | 6.06E-12  |                    |          |                 |          |
| 37                   | FBLN2       | 1.1108584       | 1.49E-41  |                    |          |                 |          |
| 38                   | PALMD       | 1.0906187       | 5.06E-12  |                    |          |                 |          |
| 39                   | PDE1C       | 1.07482238      | 1.09E-110 |                    |          |                 |          |
| 40                   | B4GALNT2    | 1.07429855      | 7.28E-14  |                    |          |                 |          |
| 41                   | ACSS1       | 1.06358194      | 4.66E-20  |                    |          |                 |          |
| 42                   | MFGE8       | 1.05614296      | 2.38E-90  |                    |          |                 |          |
| 43                   | TNS4        | 1.0509688       | 5.34E-16  |                    |          |                 |          |
| 44                   | TLN2        | 1.04209086      | 3.45E-45  |                    |          |                 |          |
| 45                   | CTSH        | 1.03611327      | 1.45E-41  |                    |          |                 |          |
| 46                   | ALPK2       | 1.03509411      | 2.10E-10  |                    |          |                 |          |
| 47                   | SARDH       | 1.02997474      | 4.28E-12  |                    |          |                 |          |
| 48                   | ALPPL2      | 1.02084613      | 4.38E-29  |                    |          |                 |          |



## Supplementary Table 6. Gene Ontology (GO) analysis and functional annotation of IRF1-regulated genes.

Gene ontology enrichment analysis was performed using DAVID 6.8. The threshold of EASE Score, a modified Fisher Exact P-Value, was used for gene-enrichment analysis.

| Term                                                                                                             | %     | p-value     | Genes                                                                 |
|------------------------------------------------------------------------------------------------------------------|-------|-------------|-----------------------------------------------------------------------|
| inflammatory response                                                                                            | 18.52 | 1.53E-06    | CXCL1, APOL3, NMI, CCL2, C3, CXCL2, CXCL8, TLR3, IL15, LGALS9         |
| defense response to virus                                                                                        | 12.96 | 9.13E-06    | IFIT3, IFIT2, DDX60, TLR3, MX1, TRIM22, GBP3                          |
| response to virus                                                                                                | 11.11 | 1.84E-05    | IFIT3, IFIT2, IFIH1, DDX60, MX1, TRIM22                               |
| immune response                                                                                                  | 16.67 | 3.12E-05    | CXCL1, CCL2, C3, CXCL2, CXCL8, IL15, HLA-B, CTSS, TRIM22              |
| type I interferon signaling pathway                                                                              | 9.26  | 3.87E-05    | IFIT3, IFIT2, HLA-B, MX1, PSMB8                                       |
| innate immune response                                                                                           | 14.81 | 2.65E-04    | IFIH1, APOL1, FYN, FGB, DDX60, TLR3,                                  |
| proteolysis involved in cellular protein catabolic process                                                       | 7.41  | 3.91E-04    | PSMB10, CTSS, PSMB8, PSMB9                                            |
| chemotaxis                                                                                                       | 9.26  | 4.72E-04    | CXCL1, CCL2, CXCL2, CXCL8, LGALS9                                     |
| signal transduction                                                                                              | 22.22 | 5.03E-04    | CXCL1, APOL3, FGG, CCL2, FGB, C3, TENM3, CXCL8, TLR3, IL15, MX1, DTNA |
| antigen processing and presentation of exogenous peptide antigen via MHC class I, TAP-dependent                  | 7.41  | 8.70E-04    | PSMB10, HLA-B, PSMB8, PSMB9                                           |
| cell chemotaxis                                                                                                  | 7.41  | 9.53E-04    | CXCL1, VCAM1, CCL2, CXCL2                                             |
| adaptive immune response                                                                                         | 9.26  | 9.74E-04    | FYN, FGB, TAP2, ERAP2, CTSS                                           |
| chemokine-mediated signaling pathway                                                                             | 7.41  | 0.001231285 | CXCL1, CCL2, CXCL2, CXCL8                                             |
| interferon-gamma-mediated signaling pathway                                                                      | 7.41  | 0.001231285 | VCAM1, NMI, HLA-B, TRIM22                                             |
| positive regulation of I-kappaB kinase/NF-kappaB signaling                                                       | 9.26  | 0.001330272 | APOL3, FYN, UBD, TRIM22, LGALS9                                       |
| lipid transport                                                                                                  | 7.41  | 0.001498741 | APOL3, APOL1, OSBPL6, APOL6                                           |
| viral process                                                                                                    | 11.11 | 0.001904387 | PSMB10, VCAM1, FYN, HLA-B, PSMB8,                                     |
| positive regulation of neutrophil chemotaxis                                                                     | 5.56  | 0.001932233 | CXCL1, CXCL2, CXCL8                                                   |
| negative regulation of type I interferon production                                                              | 5.56  | 0.003583763 | IFIH1, UBA7, UBE2L6                                                   |
| antigen processing and presentation of peptide antigen via MHC class I                                           | 5.56  | 0.003583763 | TAP2, ERAP2, HLA-B                                                    |
| stimulatory C-type lectin receptor signaling pathway                                                             | 7.41  | 0.003762113 | PSMB10, FYN, PSMB8, PSMB9                                             |
| lipoprotein metabolic process                                                                                    | 5.56  | 0.005704509 | APOL3, APOL1, APOL6                                                   |
| MAPK cascade                                                                                                     | 9.26  | 0.007600966 | PSMB10, CCL2, FYN, PSMB8, PSMB9                                       |
| T cell receptor signaling pathway                                                                                | 7.41  | 0.009716944 | PSMB10, FYN, PSMB8, PSMB9                                             |
| regulation of cellular amino acid metabolic process                                                              | 5.56  | 0.010094659 | PSMB10, PSMB8, PSMB9                                                  |
| antigen processing and presentation                                                                              | 5.56  | 0.01166882  | HLA-B, CTSS, PSMB8                                                    |
| blood coagulation, fibrin clot formation                                                                         | 3.70  | 0.011858397 | FGG, FGB                                                              |
| cellular response to interferon-gamma                                                                            | 5.56  | 0.012493782 | CCL2, TLR3, LGALS9                                                    |
| response to lipopolysaccharide                                                                                   | 7.41  | 0.012816289 | CXCL1, VCAM1, CXCL2, LGALS9                                           |
| negative regulation of angiogenesis                                                                              | 5.56  | 0.014664146 | COL4A2, CCL2, MEG3                                                    |
| modification-dependent protein catabolic process                                                                 | 3.70  | 0.014801397 | UBA7, UBE2L6                                                          |
| detection of virus                                                                                               | 3.70  | 0.014801397 | IFIH1, TLR3                                                           |
| positive regulation of ERK1 and ERK2 cascade                                                                     | 7.41  | 0.015239694 | FGG, CCL2, FGB, LGALS9                                                |
| proteolysis                                                                                                      | 11.11 | 0.016165826 | C3, CFB, TRABD2A, UBD, ERAP2, CTSS                                    |
| NIK/NF-kappaB signaling                                                                                          | 5.56  | 0.016508931 | PSMB10, PSMB8, PSMB9                                                  |
| ISG15-protein conjugation                                                                                        | 3.70  | 0.017735806 | UBA7, UBE2L6                                                          |
| negative regulation of ubiquitin-protein ligase activity involved in mitotic cell cycle                          | 5.56  | 0.018946536 | PSMB10, PSMB8, PSMB9                                                  |
| cellular response to interleukin-1                                                                               | 5.56  | 0.018946536 | CCL2, FGB, CXCL8                                                      |
| positive regulation of inflammatory response                                                                     | 5.56  | 0.019961569 | CCL2, TLR3, IL15                                                      |
| extracellular matrix organization                                                                                | 7.41  | 0.020540948 | VCAM1, COL4A2, FGG, FGB                                               |
| antigen processing and presentation of endogenous peptide antigen via MHC class I                                | 3.70  | 0.020661649 | TAP2, ERAP2                                                           |
| positive regulation of apoptotic cell clearance                                                                  | 3.70  | 0.020661649 | CCL2, C3                                                              |
| positive regulation of ubiquitin-protein ligase activity involved in regulation of mitotic cell cycle transition | 5.56  | 0.021526047 | PSMB10, PSMB8, PSMB9                                                  |
| anaphase-promoting complex-dependent catabolic process                                                           | 5.56  | 0.023139967 | PSMB10, PSMB8, PSMB9                                                  |

## Supplementary Table 6. (continued)

|                                                                                         |      |             |                                    |
|-----------------------------------------------------------------------------------------|------|-------------|------------------------------------|
| positive regulation of peptide hormone secretion                                        | 3.70 | 0.023578952 | FGG, FGB                           |
| plasminogen activation                                                                  | 3.70 | 0.026487737 | FGG, FGB                           |
| response to molecule of bacterial origin                                                | 3.70 | 0.026487737 | CXCL2, CXCL8                       |
| cellular response to interferon-alpha                                                   | 3.70 | 0.026487737 | IFIT3, IFIT2                       |
| angiogenesis                                                                            | 7.41 | 0.028671722 | COL4A2, CCL2, CXCL8, TNFAIP2       |
| positive regulation of neuron projection development                                    | 5.56 | 0.028864466 | FYN, TENM3, DPYSL3                 |
| cell-matrix adhesion                                                                    | 5.56 | 0.029465192 | VCAM1, FGG, FGB                    |
| negative regulation of cell proliferation                                               | 9.26 | 0.029944147 | CXCL1, IFIT3, RARRES3, MEG3, CXCL8 |
| Wnt signaling pathway, planar cell polarity pathway                                     | 5.56 | 0.030681622 | PSMB10, PSMB8, PSMB9               |
| positive regulation of heterotypic cell-cell adhesion                                   | 3.70 | 0.032279854 | FGG, FGB                           |
| PERK-mediated unfolded protein response                                                 | 3.70 | 0.035163235 | CCL2, CXCL8                        |
| regulation of mRNA stability                                                            | 5.56 | 0.037717825 | PSMB10, PSMB8, PSMB9               |
| protein polymerization                                                                  | 3.70 | 0.038038195 | FGG, FGB                           |
| complement activation, alternative pathway                                              | 3.70 | 0.038038195 | C3, CFB                            |
| response to ethanol                                                                     | 5.56 | 0.039057882 | VCAM1, CCL2, FYN                   |
| cellular response to tumor necrosis factor                                              | 5.56 | 0.042486433 | VCAM1, CCL2, CXCL8                 |
| platelet activation                                                                     | 5.56 | 0.04602387  | FGG, FYN, FGB                      |
| tumor necrosis factor-mediated signaling pathway                                        | 5.56 | 0.048197    | PSMB10, PSMB8, PSMB9               |
| positive regulation of canonical Wnt signaling pathway                                  | 5.56 | 0.049666362 | PSMB10, PSMB8, PSMB9               |
| cellular protein complex assembly                                                       | 3.70 | 0.05228754  | FGG, FGB                           |
| cellular response to platelet-derived growth factor stimulus                            | 3.70 | 0.05228754  | CCL2, FYN                          |
| positive regulation of NF-kappaB transcription factor activity                          | 5.56 | 0.059601848 | TLR3, TRIM22, LGALS9               |
| fibrinolysis                                                                            | 3.70 | 0.06073764  | FGG, FGB                           |
| positive regulation of exocytosis                                                       | 3.70 | 0.06073764  | FGG, FGB                           |
| positive regulation of NF-kappaB import into nucleus                                    | 3.70 | 0.06073764  | TLR3, LGALS9                       |
| negative regulation of gene expression                                                  | 5.56 | 0.062786869 | FYN, PARP10, LGALS9                |
| maternal process involved in female pregnancy                                           | 3.70 | 0.071889672 | CCL2, LGALS9                       |
| toll-like receptor signaling pathway                                                    | 3.70 | 0.077416922 | TLR3, CTSS                         |
| positive regulation of interferon-beta production                                       | 3.70 | 0.077416922 | IFIH1, TLR3                        |
| negative regulation of endothelial cell apoptotic process                               | 3.70 | 0.080168437 | FGG, FGB                           |
| negative regulation of canonical Wnt signaling pathway                                  | 5.56 | 0.084804646 | PSMB10, PSMB8, PSMB9               |
| regulation of complement activation                                                     | 3.70 | 0.085647363 | C3, CFB                            |
| cellular response to fibroblast growth factor stimulus                                  | 3.70 | 0.085647363 | CCL2, CXCL8                        |
| aging                                                                                   | 5.56 | 0.086585008 | VCAM1, CCL2, IL15                  |
| positive regulation of substrate adhesion-dependent cell spreading                      | 3.70 | 0.091094304 | FGG, FGB                           |
| positive regulation of vasoconstriction                                                 | 3.70 | 0.091094304 | FGG, FGB                           |
| JAK-STAT cascade                                                                        | 3.70 | 0.091094304 | NMI, CCL2                          |
| protein ubiquitination                                                                  | 7.41 | 0.091143526 | UBA7, UBD, UBE2L6, TRIM22          |
| negative regulation of extrinsic apoptotic signaling pathway via death domain receptors | 3.70 | 0.093805836 | FGG, FGB                           |
| regulation of immune response                                                           | 5.56 | 0.098426464 | VCAM1, C3, HLA-B                   |
| Fc-epsilon receptor signaling pathway                                                   | 5.56 | 0.098426464 | PSMB10, PSMB8, PSMB9               |

**Supplementary Table 7. Differentially expressed genes (> 0.9 log2) in PH5CH8 cells transduced with *IRF3* sgRNA.**

The differential mRNA expression in the sgRNA-expressing cells grown in triplicate compared to control was determined using DESeq2. The p-values were determined using the negative binomial Wald test. The p-values were adjusted using FDR correction.

| Down-regulated genes |         |                 |           | Up-regulated genes |         |                 |           |
|----------------------|---------|-----------------|-----------|--------------------|---------|-----------------|-----------|
| Rank                 | Gene    | Log2 Foldchange | padj      | Rank               | Gene    | Log2 Foldchange | padj      |
| 1                    | FGB     | -2.43110474     | 5.88E-180 | 1                  | COL11A1 | 1.451866601     | 1.55E-108 |
| 2                    | FBN1    | -1.89904401     | 3.17E-115 | 2                  | COL4A2  | 1.040039013     | 3.33E-100 |
| 3                    | FYN     | -1.30487143     | 1.28E-42  | 3                  | PLAC8   | 0.927984568     | 7.00E-22  |
| 4                    | MEG3    | -1.22357953     | 5.77E-37  | 4                  | PIEZO2  | 0.921067089     | 1.01E-20  |
| 5                    | PTN     | -1.18972062     | 1.47E-49  |                    |         |                 |           |
| 6                    | DSE     | -1.06998253     | 7.70E-42  |                    |         |                 |           |
| 7                    | HPGD    | -1.01419017     | 3.89E-38  |                    |         |                 |           |
| 8                    | ZNF827  | -0.98038598     | 3.29E-23  |                    |         |                 |           |
| 9                    | FGG     | -0.97147061     | 7.62E-25  |                    |         |                 |           |
| 10                   | C3      | -0.95927482     | 1.92E-43  |                    |         |                 |           |
| 11                   | ADAMTS1 | -0.9025002      | 4.15E-25  |                    |         |                 |           |

**Supplementary Table 8. IRF1-binding sites identified within the transcription regulatory region of IRF1 effector genes.**

IRF1-consensus sites aligning with the sequence Logo of the JASPAR IRF1 matrix (Matrix ID: MA0050.2)<sup>1</sup> are shown in **bold**. IRF1-ChIP sequence results were obtained from the UCSC Genome Browser<sup>2</sup>.

| Gene    | IRF1-ChIP sequence                                                                                                                                                                                                                                                                                                                                                                                                                                                                                                                                                                                                                        | position                    |
|---------|-------------------------------------------------------------------------------------------------------------------------------------------------------------------------------------------------------------------------------------------------------------------------------------------------------------------------------------------------------------------------------------------------------------------------------------------------------------------------------------------------------------------------------------------------------------------------------------------------------------------------------------------|-----------------------------|
| RARRES3 | CCCTTCGACTCTGGCTGCTCCCAAGGTGGCTTTAAAGCACCAATGAGTCCATGGCTTGTGTAAGAAATGATTAGTC<br>CTTCCATCTAGAGAAATAGCTCCTTTTTAAACAGTTGTCTCTTTTAAACAGTGTTTAGTATTAAAGTGAGGTTGAAACA<br>GTGTCAAAAG <b>GAAAGTGAAAGTGA</b> AATTCTCTCCTCAGCATAAAAGCTGATCCACAAACAAGAGGAGCACCAGA<br>CCTCCTTTGGCTTCGAGATGGCTTCGGTAAGTTTCCAGGGCTTTGCATTACTGACTCTACAGCAGTTGGGCAGC<br>TCCCCCTAGGAAAGGCCTCAGTCCAGGCTCCTGGCTTGGGCACACAGCT                                                                                                                                                                                                                                                 | chr11:63304093-<br>63304448 |
| PSMB9   | GCCCCGGTGGGGCCTGAAGTCCGGGTACCGCCGAGTCTCCCTACTGGCGGCTGGGGGAGGGAACGAGGG<br>CGGGGCTCTCGAAAGTCCAGGAACAGGCTGATCTGCGCTGGCGAGAAGCTCAGCCATTTAGGG <b>GAAAGCG</b><br><b>AAATCGAAAGC</b> GGCCGCCTGCTCACTAGATAACGCCTACTTCCAAAAGTGGCCTGCCAGACTATTTTGGTAGCAA<br>GCGTGAATCAGATCTGAGAATCTCGGGAGCAGCCCTGGTGCCCAATTTTCTCCATCACGCACACCCTTCTCGC<br>CTCTCCTGCCTCTGCCTTTCCACTTGCACAGTTTTCCACCCAGCCTCAGGGCGGGGCTGCCTCGTCACTT<br>GTCTCGGGCAGATCTGCCCTACACACGTTAGCGCCGCGCAAGCAGCCCCGACGCCAGCCAGCGCCTCCT<br>GGCGGCCCGGAAGGGGGGGGCTGTGGCTGCGCTTGTGCGCTGTCCAGTTGGAACCAAGTCCCA<br>GGCGCGAGGAGAGCGGTGCCTTGCAGGATGCTGCGGGCGGAGCACCAACCGGGACTTACCCCGGGCGG<br>GAGAAGTCCACA | chr6:32821462-<br>32822061  |
| GBP3    | GTTGTTTCTGCTCACTTCTTTTTCTTCGCTGGATCGCTGGACTTTTATTTACCCCTTCAGTGTGTGAGCTTTCT<br>GGATTTTCTCAGTGATCAAATAATTAGAAGTTAAGCAACCTTTGTAATGGCTTTCAGAGCCTAAT <b>GAAACTGAAAGT</b><br>ACTTCTTCAAGGAAGTACTCAGTAACCATAAATGCAATTTCTGGATTCTGCTAGTAGGAGGTTTAAAGTCAAGTT<br>TCAAAGTTTTTTTGTGGAAGAGATCTTAGAGACCATTATTGTTTTAAAACATGTCCATTAGGTATTGAAAAAA                                                                                                                                                                                                                                                                                                           | chr1:89488395-<br>89488704  |
| SAMD9L  | CTCTCAGGGACAAGCCACCCCATCTTTGAGAGACCCTCAGCAACACCCTGATATCCATGCCCTAGGGAGGTGT<br>TCTGCTCTGCAGGATTCTTAGAACTGATGTAGGGGAAACACACTTCAGAATCTGGCTGTAGCCAGGAGAGCTACC<br>CACACCCTCCTGCATAGTCTGGCAGACAGAAGCCACACAAGCAAG <b>TAGTTTCGTTTTTC</b> CTGAAGAACACTTTGC<br>ATTTTTTTCTTAGTTTTCAACCAGATTGCTGGATAAGATGTATGGAATGAAATACTTTAATAGAATAATATTAGCCTC<br>TGCAGAGTATTAACCTTGATAAAATGTAAGTTTTAATAACATCTTACGTTATGAAGACAGAATTT                                                                                                                                                                                                                                   | chr7:92776771-<br>92777145  |
| IFIT3   | CTCTCAGGGACAAGCCACCCCATCTTTGAGAGACCCTCAGCAACACCCTGATATCCATGCCCTAGGGAGGTGT<br>TCTGCTCTGCAGGATTCTTAGAACTGATGTAGGGGAAACACACTTCAGAATCTGGCTGTAGCCAGGAGAGCTACC<br>CACACCCTCCTGCATAGTCTGGCAGACAGAAGCCACACAAGCAAG <b>TAGTTTCGTTTTTC</b> CTGAAGAACACTTTGC<br><b>ATTTT</b> TTTTCTTAGTTTTCAACCAGATTGCTGGATAAGATGTATGGAATGAAATACTTTAATAGAATAATATTAGCCTC<br>TGCAGAGTATTAACCTTGATAAAATGTAAGTTTTAATAACATCTTACGTTATGAAGACAGAATTT                                                                                                                                                                                                                          | chr7:92776771-<br>92777145  |
| APOL6   | CTCTCAGGGACAAGCCACCCCATCTTTGAGAGACCCTCAGCAACACCCTGATATCCATGCCCTAGGGAGGTGT<br>TCTGCTCTGCAGGATTCTTAGAACTGATGTAGGGGAAACACACTTCAGAATCTGGCTGTAGCCAGGAGAGCTACC<br>CACACCCTCCTGCATAGTCTGGCAGACAGAAGCCACACAAGCAAG <b>TAGTTTCGTTTTTC</b> CTGAAGAACACTTTGC<br>ATTTTTTTCTTAGTTTTCAACCAGATTGCTGGATAAGATGTATGGAATGAAATACTTTAATAGAATAATATTAGCCTC<br>TGCAGAGTATTAACCTTGATAAAATGTAAGTTTTAATAACATCTTACGTTATGAAGACAGAATTT                                                                                                                                                                                                                                   | chr7:92776771-<br>92777145  |
| ERAP2   | CATACCCCATATAGTCCATCCTATAACACAGCCAGGACAGAGACGAGAGACTCAGGCCTCCTGACTTGGATTCTG<br>CTCTTTCACCTCCTTGTTCATCCAATTAGAGAACTGGCAAAAAG <b>GAAACTGAAAGT</b> GACAGCTGGAGCCCATGAT<br>TTCCTGGAAGAGCCCTAGAGCTTTGCTTTTTCTCTCCTGCAGCACTTAACCGAAACCAGTTTTGCAATCAATCCTG<br>TTCAAAGGCCACCCTACTCTCCTATCGTCTTCTCCAGCCAGACACTCACAGCCCTGCCAGACCAGGGGA<br>CCTCGG                                                                                                                                                                                                                                                                                                    | chr22:36044284-<br>36044593 |
| UBA7    | GAACAGTAGGCTGCAGCGCTCAGAGATAGGGTCTTTGTAGGTGGCGGTGACAGTAGGGGCCAGTCCCTGCT<br>GTAGCCAGTGCAAACAGGAACCAAGGCCAAGCAATAAGGGACGCTGCTGGTCAACAGCTCTCTTCTGGAGAAA<br><b>AGAAAAGTGA</b> AAGTTAAACTATGCTCTGAGCTGGCTCCTGATCCTGCCTCCAGACGCCAGCCCCAGACAGGCCAT<br>TCAGGGTCTAAAACCTGGGATGAGTTCAGGACTCTCAAGAGGTGATCAGTCTCTGAGTGCAGACCTGAGGGTG<br>GGAGGCATGGGGCAGCCACATTCACACATGTTCTATTTTCTTTTAGACTTTTATTT                                                                                                                                                                                                                                                      | chr3:49851237-<br>49851592  |

|       |                                                                                                                                                                                                                                                                                                                                                                                                          |                              |
|-------|----------------------------------------------------------------------------------------------------------------------------------------------------------------------------------------------------------------------------------------------------------------------------------------------------------------------------------------------------------------------------------------------------------|------------------------------|
| APOL1 | ACCCCCAGCCCTGAGGATGCGAGGCAGGTGGGTTGGATGAGAGGGATCTGGATGTCTGGTCTCAGGCTGCTCCT<br>CTAAGGGCAGCAGCAAGGAGGGTGGGGCTGGACTGAAGGTGGAGGGGAGCGTGTTCCTGTGCTTGGTTCATGA<br>GCTGCTGGGAAGTTGTG <u>ACTTTCACCTTC</u> CCTTTTCGAATTCCTCGGTATATCTTGGGACTGGAGGACCTGTCTGG<br>TTATTATACAGACGCATAACTGGAGGTGGGATCCACACAGCTCAGAACAGCTGGATCTTGCTCAGTCTCTGCCAGG<br>GGAAGATTCT                                                           | chr2:36648954-<br>36649263   |
| CFB   | TTCCCCCCGCACCAACTCACCAGCCGCGGGGGAGACCCGAGCTCCGGGACTTCTGCTTCAGCGTGAGG<br>TCCGCTCCGTCTCTCCAACCTCGCTACCGGCTCTGGTCCGCCAGCTACGCTCGGCCAGGGCGGGCCTCAGGG<br>CTCGGGCAGCTTTCG <u>CTTTCGCTTC</u> CCCAGCCAAGGCCCTTATTCTGGGCTGGGCCCGGGAGGGGGCGCGC<br>GAGACCCGACAGCGGAAGTGGAGCCGAACTCTGGTTCGCACTGTACAGGCTGCAATGAGTCTCACTCGC<br>CTTTAGTGGCGTTACTCTGGGATATAAACTGCAAAAATGTTTCTTTATCATTAAAGTAAATACAGT                      | chr6:32806409-<br>32806769   |
| APOL3 | GAACAGTAGGCTGCAGCGCTCAGAGATAGGGTCTTTGTGTAGGTGGCGGTGACAGTAGGGCCAGTCCCTGCT<br>GTAGCCAGTGCAAACAGGAACCAAGGCCAAGCGAATAAGGGACGCTGCTGGTCCAGCTCTCTTCTGGAGAAA<br>AG <u>AAAAGTGAAG</u> TTAAACTATGCTCTGAGCTGGCTCCTGATCCTGCCTCCAGACGCCAGCCCCAGACAGGCCAT<br>TCAGGGTCTAAACCTGGGATGAGTTCAGGACTCTCAAGAGGTGATCAGTCTCTGAGTGTACAGCTGAGGGTG<br>GGAGGCATGGGCAGCCACATTCACACATGTTCTATTTCCTTTTAGACTTTTATT                        | chr3:49851237-<br>49851592   |
| NMI   | TTATGTTAGTTTATATTGCAAAGGAGAATTAAGGCTGCAGATTGAATTAAGGTTGCTAATCAGCTTGTCTTTAAATATG<br>GAGAGCATCTGGATTATCTGTGGGAGCCAGTGAATCATGAGGCTACTT <u>AAAAGTGAAG</u> CGGAAGACAGAAG<br>AAGAGTCAAGAGTGAATGTGACCCCGAAGAACTTTCAGAGGCGCAATGTTGCTGGCCCTGAAGATGAGGAA<br>GGGCTGCTGAGCCAAATAAGGTAGGTGGCCTCCGGAAGATGAAAAGAGGATCACCCCAAGACTTCCAGAAA<br>GAAGCAA                                                                     | chr2:152144687-<br>152144996 |
| MX1   | GAACAGTAGGCTGCAGCGCTCAGAGATAGGGTCTTTGTGTAGGTGGCGGTGACAGTAGGGCCAGTCCCTGCT<br>GTAGCCAGTGCAAACAGGAACCAAGGCCAAGCGAATAAGGGACGCTGCTGGTCCAGCTCTCTTCTGGAGAAA<br>AG <u>AAAAGTGAAG</u> TTAAACTATGCTCTGAGCTGGCTCCTGATCCTGCCTCCAGACGCCAGCCCCAGACAGGCCAT<br>TCAGGGTCTAAACCTGGGATGAGTTCAGGACTCTCAAGAGGTGATCAGTCTCTGAGTGTACAGCTGAGGGTG<br>GGAGGCATGGGCAGCCACATTCACACATGTTCTATTTCCTTTTAGACTTTTATT                        | chr3:49851237-<br>49851592   |
| TLR3  | GTGAGGTCCCACTTTCAACTTTAGCTGTTGCTAAATCTGTGACCCCTTCAATGAAATCCAAGGATCTCAGCTAAA<br>AAAAGTTAAATAAAATAAAACTAGGTGTTTTTCAGAGCGGTTTGAACGCCTCTCTGAGTTGTCAGAGATTGT<br>TTTTGTTTTCTCCCTTTGCCCTTCTTGAATGCACCAAATAAAAGCATTTTTTTTCAAGCTTTA <u>CTTTCACCTTC</u> G<br>GAGTGCCGTCTATTTGCCACACACTTCCCTGATGAAATGTCTGGATTTGGACTAAAGAAAAAGGAAAGGCTAGCA<br>GTCATCCAAGTAAGTGAAGGTGTTCACTTTACAGTCTTACTGGGCAGGGTCTCTCTTGTGAGTAGATTTG | chr4:186990085-<br>186990465 |
| IFIT2 | CCCCAGACCCATCTTAAAGTGAAGCACCAGGCCGATGAAACATCCCTCTCTGCTGCCTTCTTCTCTGATCACAAC<br>TCAGCTCCGGAGGAAAAAGAGTCTCTAAAGTATAATAAAAGAAAAAGAAAAAGAGTCTGCCAATTTCACTTT<br>C <u>TAGTTTCACCTTC</u> CCTTTTGAACGTGAGCTGAAGGAAACAAACAAAAAGAACAGAGGCCACTTGTATATATA<br>GGTCTCTCAGCATTATTGGTGGCAGAAGAGGAAATTCTGAAGAGTGCAGCTGCCTGAACCGAGCCCTGCCG<br>AACAGCTGAGAATTGCACTGCAACCATGAGGTAATATTTCCCTTCGTAT                            | chr10:91061551-<br>91061906  |
| TAP2  | TTCCCCCCGCACCAACTCACCAGCCGCGGGGGAGACCCGAGCTCCGGGACTTCTGCTTCAGCGTGAGG<br>TCCGCTCCGTCTCTCCAACCTCGCTACCGGCTCTGGTCCGCCAGCTACGCTCGGCCAGGGCGGGCCTCAGGG<br>CTCGGGCAGC <u>CTTTCGCTTC</u> CTTCCCAGCCAAGGCCCTTATTCTGGGCTGGGCCCGGGAGGGGGCGCGC<br>GAGACCCGACAGCGGAAGTGGAGCCGAACTCTGGTTCGCACTGTACAGGCTGCAATGAGTCTCACTCGC<br>CTTTAGTGGCGTTACTCTGGGATATAAACTGCAAAAATGTTTCTTTATCATTAAAGTAAATACAGT                        | chr6:32806409-<br>32806769   |
| DDX60 | CTCAGGACCGGTGGTGTCCAAGACCCGCGAGCTGCGCGCCCGCGGGGAGGGAGTGAACAGAGACCTAGC<br>GCAGAGCCAGGTGGAAGTTCCAGGTTACCCAGACCTGGCCTAGGACTCGGCGCTCTGAGCCACCCGAGCCA<br>GTCTTTTATGCATCCGGCGGGA <u>GTTTCGGTTTC</u> CTTTCTCCTCTCAGAAGCACTTAG <u>GTTTCAGTTTC</u> CTTTCAGCA<br>CGAATTAGGCGAGGCATTTCTGTGAAAGTTTAGCATCCTTCCCTTCAATCAGAATCTTAAAGGGGAGCATGGC<br>GAGACGTTAGTTAAAGGTGAAGTTACAATAGCTAGGAAGAACCAGTTCTGGTATT              | chr4:169239779-<br>169240134 |

### Supplementary References

- 1 Mathelier, A. *et al.* JASPAR 2016: a major expansion and update of the open-access database of transcription factor binding profiles. *Nucleic Acids Res* **44**, D110-115 (2016).
- 2 Casper, J. *et al.* The UCSC Genome Browser database: 2018 update. *Nucleic Acids Res* **46**, D762-D769 (2018).

**Supplementary Table 9. The exact *p*-values for the statistical analysis in Figures 1-4.**

| Figure | Comparison                                              | <i>p</i> -value |
|--------|---------------------------------------------------------|-----------------|
| 1a     | <i>IRF1</i> vs. control                                 | < 0.0001        |
| 1b     | HAV RNA, <i>IRF1</i> #1 vs. control                     | 0.0002          |
| 1b     | HAV RNA, <i>IRF1</i> #2 vs. control                     | 0.0002          |
| 1b     | HAV RNA, <i>RELA</i> #1 vs. control                     | 0.015           |
| 1b     | HAV titer, <i>IRF1</i> #1 vs. control                   | 0.0091          |
| 1b     | HAV titer, <i>IRF1</i> #2 vs. control                   | < 0.0001        |
| 1c     | Fecal HAV RNA, <i>Irf1</i> <sup>-/-</sup> vs. WT        | 0.1304          |
| 1c     | Liver HAV RNA (d7), <i>Irf1</i> <sup>-/-</sup> vs. WT   | 0.0286          |
| 1d     | <i>IRF1</i> #2 vs. control                              | < 0.0001        |
| 1e     | <i>IRF1</i> #2 vs. control                              | 0.001           |
| 1f     | Ruxolitinib vs. DMSO                                    | 0.0018          |
| 1f     | Pyridone 6 vs. DMSO                                     | 0.0105          |
| 1f     | DMSO-treated, <i>IRF1</i> #1 vs. control                | 0.0082          |
| 1f     | DMSO-treated, <i>IRF1</i> #2 vs. control                | 0.0042          |
| 1f     | Ruxolitinib-treated, <i>IRF1</i> #1 vs. control         | 0.0287          |
| 1f     | Ruxolitinib-treated, <i>IRF1</i> #2 vs. control         | < 0.0001        |
| 1g     | Control sgRNA, <i>IRF1</i> #2 vs. control               | 0.0052          |
| 1g     | <i>MAVS</i> sgRNA, <i>IRF1</i> #2 vs. control           | 0.0095          |
| 1g     | <i>IRF3</i> sgRNA, <i>IRF1</i> #2 vs. control           | 0.0016          |
| 1h     | <i>IRF1</i> #1 vs. control                              | 0.0006          |
| 1h     | <i>IRF1</i> #2 vs. control                              | 0.0003          |
| 1h     | DAA vs. control                                         | 0.0056          |
| 1i     | 24 h, <i>IRF1</i> #1 vs. control                        | < 0.0001        |
| 1i     | 24 h, <i>IRF1</i> #2 vs. control                        | < 0.0001        |
| 1i     | 48 h, <i>IRF1</i> #1 vs. control                        | < 0.0001        |
| 1i     | 48 h, <i>IRF1</i> #2 vs. control                        | < 0.0001        |
| 1j     | DENV-24 h, <i>IRF1</i> vs. control siRNA                | < 0.0001        |
| 1j     | DENV-48 h, <i>IRF1</i> vs. control siRNA                | 0.0006          |
| 1j     | ZIKV-24 h, <i>IRF1</i> vs. control siRNA                | 0.0015          |
| 1j     | ZIKV-48 h, <i>IRF1</i> vs. control siRNA                | 0.0348          |
| 2a     | Mock, PRDIII-I activity, <i>IRF1</i> #1 vs. control     | < 0.0001        |
| 2a     | Mock, PRDIII-I activity, <i>IRF1</i> #2 vs. control     | < 0.0001        |
| 2a     | Mock, PRDIII-I activity, <i>IRF1</i> #1 vs. <i>IRF3</i> | < 0.0001        |
| 2a     | Mock, PRDIII-I activity, <i>IRF1</i> #2 vs. <i>IRF3</i> | < 0.0001        |
| 2a     | HAV, PRDIII-I activity, <i>IRF1</i> #1 vs. control      | < 0.0001        |
| 2a     | HAV, PRDIII-I activity, <i>IRF1</i> #2 vs. control      | < 0.0001        |
| 2a     | HAV, PRDIII-I activity, <i>IRF1</i> #1 vs. <i>IRF3</i>  | < 0.0001        |
| 2a     | HAV, PRDIII-I activity, <i>IRF1</i> #2 vs. <i>IRF3</i>  | < 0.0001        |
| 2a     | Mock, ISRE activity, <i>IRF1</i> #1 vs. control         | < 0.0001        |
| 2a     | Mock, ISRE activity, <i>IRF1</i> #2 vs. control         | < 0.0001        |
| 2a     | Mock, ISRE activity, <i>IRF1</i> #1 vs. <i>IRF3</i>     | < 0.0001        |
| 2a     | Mock, ISRE activity, <i>IRF1</i> #2 vs. <i>IRF3</i>     | < 0.0001        |
| 2a     | HAV, ISRE activity, <i>IRF1</i> #1 vs. control          | < 0.0001        |
| 2a     | HAV, ISRE activity, <i>IRF1</i> #2 vs. control          | < 0.0001        |
| 2a     | HAV, ISRE activity, <i>IRF1</i> #1 vs. <i>IRF3</i>      | < 0.0001        |
| 2a     | HAV, ISRE activity, <i>IRF1</i> #2 vs. <i>IRF3</i>      | < 0.0001        |
| 2b     | PRDIII-I activity, SeV vs. Mock                         | 0.0116          |
| 2b     | ISRE activity, SeV vs. Mock                             | < 0.0001        |
| 2c     | Mock, PRDIII-I activity, <i>IRF1</i> #1 vs. control     | < 0.0001        |
| 2c     | Mock, PRDIII-I activity, <i>IRF1</i> #2 vs. control     | 0.0001          |
| 2c     | SeV, PRDIII-I activity, <i>IRF1</i> #1 vs. control      | < 0.0001        |
| 2c     | SeV, PRDIII-I activity, <i>IRF1</i> #2 vs. control      | 0.0002          |
| 2c     | Mock, ISRE activity, <i>IRF1</i> #1 vs. control         | < 0.0001        |
| 2c     | Mock, ISRE activity, <i>IRF1</i> #2 vs. control         | < 0.0001        |
| 2c     | SeV, ISRE activity, <i>IRF1</i> #1 vs. control          | < 0.0001        |
| 2c     | SeV, ISRE activity, <i>IRF1</i> #2 vs. control          | < 0.0001        |
| 2e     | DMSO, <i>IRF1</i> #1 vs. control                        | < 0.0001        |
| 2e     | DMSO, <i>IRF1</i> #2 vs. control                        | 0.006           |
| 2e     | ActD, <i>IRF1</i> #1 vs. control                        | 0.0013          |

|    |                                                      |          |
|----|------------------------------------------------------|----------|
| 2e | ActD, <i>IRF1</i> #2 vs. control                     | 0.04     |
| 2f | DENV-DMSO, <i>IRF1</i> vs. control siRNA             | 0.018    |
| 2f | DENV-ActD, <i>IRF1</i> vs. control siRNA             | 0.021    |
| 2f | ZIKV-DMSO, <i>IRF1</i> vs. control siRNA             | 0.0003   |
| 2f | ZIKV-ActD, <i>IRF1</i> vs. control siRNA             | 0.015    |
| 3e | <i>RARRES3</i> vs. control siRNA                     | < 0.0001 |
| 3e | <i>APOL6</i> vs. control siRNA                       | 0.0049   |
| 3e | <i>ERAP2</i> vs. control siRNA                       | < 0.0001 |
| 3e | <i>NMI</i> vs. control siRNA                         | 0.0004   |
| 3e | <i>MX1</i> vs. control siRNA                         | 0.0094   |
| 3f | <i>RARRES3</i> vs. control siRNA                     | 0.0015   |
| 3f | <i>ERAP2</i> vs. control siRNA                       | 0.0047   |
| 3f | <i>NMI</i> vs. control siRNA                         | 0.0072   |
| 3f | <i>MX1</i> vs. control siRNA                         | 0.0125   |
| 3f | All 4 genes vs. control siRNA                        | 0.004    |
| 3g | <i>PSMB9</i> vs. control siRNA                       | < 0.0001 |
| 3g | <i>IFIT3</i> vs. control siRNA                       | 0.0348   |
| 3g | <i>ERAP2</i> vs. control siRNA                       | 0.0383   |
| 3g | <i>APOL1</i> vs. control siRNA                       | < 0.0001 |
| 3g | <i>MX1</i> vs. control siRNA                         | 0.0003   |
| 3g | DAA vs. control siRNA                                | < 0.0001 |
| 3h | <i>PSMB9</i> vs. control siRNA                       | 0.0047   |
| 3h | <i>APOL1</i> vs. control siRNA                       | 0.0027   |
| 3h | <i>MX1</i> vs. control siRNA                         | 0.015    |
| 3h | All 3 genes vs. control siRNA                        | 0.0003   |
| 3i | <i>RARRES3</i> vs. control siRNA                     | 0.0272   |
| 3i | <i>PSMB9</i> vs. control siRNA                       | 0.0275   |
| 3i | <i>ERAP2</i> vs. control siRNA                       | 0.0206   |
| 3i | <i>MX1</i> vs. control siRNA                         | 0.0192   |
| 3j | <i>PSMB9</i> vs. control siRNA                       | 0.0196   |
| 3j | <i>MX1</i> vs. control siRNA                         | 0.0155   |
| 3j | All 2 genes vs. control siRNA                        | 0.0026   |
| 3k | <i>RARRES3</i> vs. control siRNA                     | 0.0015   |
| 3k | <i>PSMB9</i> vs. control siRNA                       | < 0.0001 |
| 3k | <i>ERAP2</i> vs. control siRNA                       | 0.0058   |
| 3k | <i>APOL1</i> vs. control siRNA                       | 0.0011   |
| 3k | <i>CFB</i> vs. control siRNA                         | 0.0003   |
| 3k | <i>APOL3</i> vs. control siRNA                       | 0.002    |
| 3k | <i>NMI</i> vs. control siRNA                         | 0.0004   |
| 3k | <i>MX1</i> vs. control siRNA                         | < 0.0001 |
| 3k | <i>DDX60</i> vs. control siRNA                       | 0.0149   |
| 3l | <i>PSMB9</i> vs. control siRNA                       | 0.0015   |
| 3l | <i>MX1</i> vs. control siRNA                         | 0.0014   |
| 3l | All 2 genes vs. control siRNA                        | 0.0002   |
| 4a | PH5CH8/ <i>IRF1</i> sgRNA, <i>RARRES3</i> vs. Vector | < 0.0001 |
| 4a | PH5CH8/ <i>IRF1</i> sgRNA, C113S vs. Vector          | 0.0215   |
| 4a | Huh-7.5 cells, <i>RARRES3</i> vs. Vector             | < 0.0001 |
| 4b | 24 h, DMSO, <i>RARRES3</i> vs. Vector                | < 0.0001 |
| 4c | HAV-Luc, <i>RARRES3</i> vs. Vector                   | < 0.0001 |
| 4d | <i>RARRES3</i> vs. Vector                            | < 0.0001 |
| 4h | Rapamycin, HAV/NLuc vs. HCV/GLuc                     | < 0.0001 |
| 4h | Rapamycin, HAV/NLuc vs. DENV/NLuc                    | < 0.0001 |
| 4h | Torin1, HAV/NLuc vs. HCV/GLuc                        | < 0.0001 |
| 4h | Torin1, HAV/NLuc vs. DENV/NLuc                       | < 0.0001 |
| 4h | PI-103, HAV/NLuc vs. HCV/GLuc                        | 0.003    |
| 4h | PI-103, HAV/NLuc vs. DENV/NLuc                       | < 0.0001 |
| 4i | Rapamycin vs. DMSO                                   | < 0.0001 |
| 4i | Torin1 vs. DMSO                                      | < 0.0001 |
| 4i | PI-103 vs. DMSO                                      | < 0.0001 |
